# Supplementary material
Source: Oxford University Press journal article supplement (doi:10.1051/bsgf_2017195)
Supplement: bsgf_2017_188_6_170006-1-olm.zip [file bsgf_2017_188_6_170006-1-olm.zip]

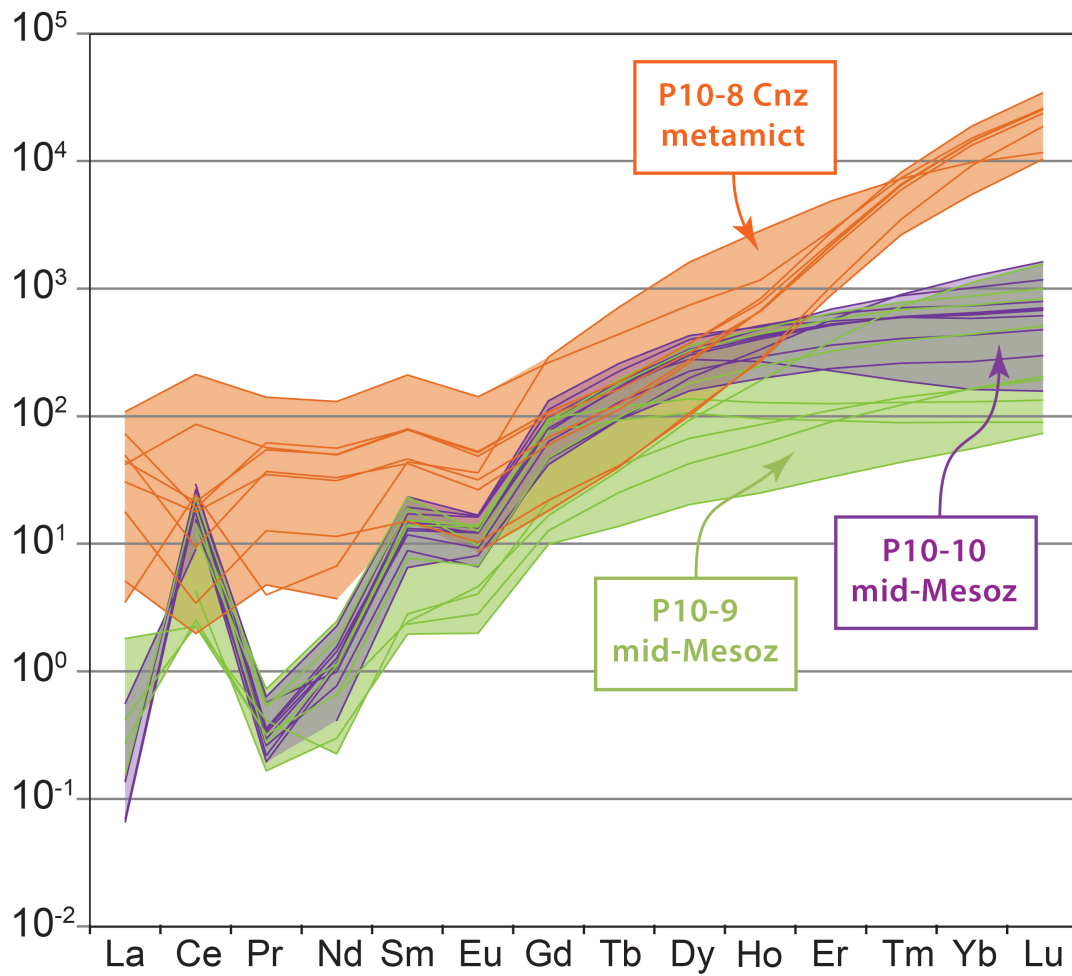

Chondrite-normalized REE patterns (LA-ICPMS measurements) of metamict zircons from sample P10-8 and of mid-Mesozoic zircon domains from samples P10-9 and P10-10. Normalization values from McDonough and Sun (1995).

McDonough, W.F., & Sun, S.S. (1995). The composition of the Earth. *Chemical Geology*, 120, 223-253.
