# Supplementary material
Source: Oxford University Press journal article supplement (doi:10.1051/bsgf_2017195)
Supplement: bsgf_2017_188_6_170006-1-olm.zip [file bsgf_2017_188_6_170006-1-olm.zip]

**Table 1** Representative microprobe analyses of garnet. Cations based on 12 oxygens. Ferric iron was estimated using the method of Droop (1987).

| Sample                         | Cpx-bearing |        |        |        |        |        |        |        | Cpx-free |        |       |        |        |       |       |       |       |
|--------------------------------|-------------|--------|--------|--------|--------|--------|--------|--------|----------|--------|-------|--------|--------|-------|-------|-------|-------|
|                                | P04-47      |        |        |        | P05-01 |        |        |        | P04-48   |        |       |        | P10-9  |       |       |       |       |
| Point                          | 76          | 73     | 70     | 5      | 14     | 22     | 23     | 10     | 53       | 22     | 25    | 9      | 20     | 16    | 5     | 22    | 10    |
| Description                    | core        | core   | rim    | rim    | rim    | core   | core   | rim    | rim      | core   | core  | rim    | rim    | core  | rim   | rim   | rim   |
| SiO <sub>2</sub>               | 38.23       | 38.46  | 37.76  | 38.23  | 38.03  | 38.40  | 38.60  | 37.85  | 37.86    | 37.63  | 37.40 | 37.79  | 37.56  | 37.32 | 37.50 | 37.66 | 37.45 |
| TiO <sub>2</sub>               | 0.10        | 0.12   | 0.09   | 0.11   | 0.12   | 0.03   | 0.08   | 0.05   | 0.08     | 0.05   | 0.06  | 0.02   | 0.08   | 0.03  | 0.12  | 0.12  | 0.03  |
| Al <sub>2</sub> O <sub>3</sub> | 21.34       | 21.43  | 21.19  | 20.97  | 21.18  | 21.12  | 21.23  | 21.95  | 21.94    | 21.44  | 21.11 | 21.11  | 20.80  | 20.90 | 20.60 | 21.19 | 20.55 |
| Cr <sub>2</sub> O <sub>3</sub> | 0.01        | 0.00   | 0.01   | 0.00   | 0.00   | 0.03   | 0.03   | 0.07   | 0.00     | 0.00   | 0.03  | 0.00   | 0.04   | 0.00  | 0.00  | 0.00  | 0.00  |
| FeO                            | 27.49       | 27.71  | 28.64  | 27.02  | 27.56  | 27.52  | 25.87  | 28.29  | 27.92    | 28.92  | 28.83 | 28.74  | 30.52  | 28.67 | 30.56 | 29.98 | 32.18 |
| MnO                            | 0.61        | 0.55   | 0.76   | 1.36   | 2.32   | 0.63   | 0.54   | 0.98   | 0.98     | 1.06   | 0.86  | 1.25   | 1.48   | 0.64  | 0.71  | 0.45  | 0.90  |
| MgO                            | 4.45        | 4.47   | 3.84   | 3.29   | 2.74   | 4.69   | 4.43   | 3.78   | 3.34     | 4.40   | 4.69  | 3.76   | 3.23   | 3.48  | 2.51  | 3.04  | 2.73  |
| CaO                            | 8.33        | 8.55   | 8.26   | 10.15  | 8.91   | 7.84   | 9.76   | 8.58   | 8.08     | 7.47   | 6.99  | 7.30   | 7.35   | 7.87  | 7.75  | 8.26  | 5.88  |
| Na <sub>2</sub> O              | 0.06        | 0.03   | 0.01   | 0.00   | 0.00   | 0.01   | 0.01   | 0.01   | 0.04     | 0.02   | 0.04  | 0.01   | 0.01   | 0.00  | 0.00  | 0.00  | 0.00  |
| K <sub>2</sub> O               | 0.00        | 0.00   | 0.02   | 0.00   | 0.00   | 0.01   | 0.00   | 0.03   | 0.18     | 0.00   | 0.00  | 0.00   | 0.01   | 0.00  | 0.00  | 0.00  | 0.00  |
| Total                          | 100.61      | 101.32 | 100.58 | 101.13 | 100.86 | 100.27 | 100.55 | 101.59 | 100.41   | 100.97 | 100.0 | 100.00 | 101.08 | 98.91 | 99.75 | 100.7 | 99.72 |
| Formula                        |             |        |        |        |        |        |        |        |          |        |       |        |        |       |       |       |       |
| Si                             | 2.99        | 2.98   | 2.97   | 2.99   | 2.99   | 3.00   | 3.00   | 2.95   | 2.98     | 2.95   | 2.95  | 2.99   | 2.97   | 2.99  | 3.00  | 2.97  | 3.00  |
| Al iv                          | 0.01        | 0.02   | 0.03   | 0.01   | 0.01   | 0.00   | 0.00   | 0.05   | 0.03     | 0.05   | 0.05  | 0.01   | 0.04   | 0.01  | 0.00  | 0.03  | 0.00  |
| Al vi                          | 1.95        | 1.95   | 1.94   | 1.92   | 1.96   | 1.95   | 1.95   | 1.96   | 2.01     | 1.93   | 1.92  | 1.96   | 1.91   | 1.96  | 1.94  | 1.95  | 1.95  |
| Ti                             | 0.01        | 0.01   | 0.01   | 0.01   | 0.01   | 0.00   | 0.01   | 0.00   | 0.01     | 0.00   | 0.00  | 0.00   | 0.01   | 0.00  | 0.01  | 0.01  | 0.00  |
| Cr                             | 0.00        | 0.00   | 0.00   | 0.00   | 0.00   | 0.00   | 0.00   | 0.01   | 0.00     | 0.00   | 0.00  | 0.00   | 0.00   | 0.00  | 0.00  | 0.00  | 0.00  |
| Fe <sup>3+</sup>               | 0.04        | 0.04   | 0.05   | 0.06   | 0.03   | 0.04   | 0.04   | 0.03   | 0.00     | 0.06   | 0.06  | 0.03   | 0.08   | 0.03  | 0.04  | 0.04  | 0.04  |
| Fe <sup>2+</sup>               | 1.76        | 1.76   | 1.83   | 1.70   | 1.78   | 1.76   | 1.65   | 1.82   | 1.86     | 1.83   | 1.84  | 1.87   | 1.94   | 1.88  | 2.00  | 1.94  | 2.12  |
| Mn                             | 0.04        | 0.04   | 0.05   | 0.09   | 0.16   | 0.04   | 0.04   | 0.06   | 0.07     | 0.07   | 0.06  | 0.08   | 0.10   | 0.04  | 0.05  | 0.03  | 0.06  |
| Mg                             | 0.52        | 0.52   | 0.45   | 0.38   | 0.32   | 0.55   | 0.51   | 0.44   | 0.39     | 0.51   | 0.55  | 0.44   | 0.38   | 0.42  | 0.30  | 0.36  | 0.33  |
| Ca                             | 0.70        | 0.71   | 0.70   | 0.85   | 0.75   | 0.66   | 0.81   | 0.72   | 0.68     | 0.63   | 0.59  | 0.62   | 0.62   | 0.68  | 0.66  | 0.70  | 0.51  |
| Total                          | 8.01        | 8.01   | 8.02   | 8.02   | 8.01   | 8.00   | 8.00   | 8.03   | 8.01     | 8.04   | 8.03  | 8.01   | 8.03   | 8.01  | 8.01  | 8.02  | 8.00  |
| Mg/(Mg+Fe <sup>2+</sup> )      | 0.23        | 0.23   | 0.20   | 0.18   | 0.15   | 0.24   | 0.24   | 0.19   | 0.17     | 0.22   | 0.23  | 0.19   | 0.16   | 0.18  | 0.13  | 0.16  | 0.13  |
| Almandine                      | 58.00       | 58.00  | 60.00  | 56.00  | 59.00  | 58.00  | 54.00  | 59.00  | 62.00    | 59.00  | 59.00 | 65.00  | 63.00  | 62.00 | 66.00 | 63.00 | 70.01 |
| Andradite                      | 2.00        | 2.00   | 3.00   | 3.00   | 2.00   | 2.00   | 2.00   | 1.00   | 0.00     | 3.00   | 3.00  | 2.00   | 4.00   | 2.00  | 2.00  | 2.00  | 2.12  |
| Grossular                      | 22.00       | 22.00  | 21.00  | 25.00  | 24.00  | 20.00  | 25.00  | 23.00  | 23.00    | 18.00  | 17.00 | 18.00  | 17.00  | 21.00 | 20.00 | 21.00 | 14.86 |
| Pyrope                         | 17.00       | 17.00  | 15.00  | 13.00  | 11.00  | 18.00  | 17.00  | 15.00  | 13.00    | 17.00  | 19.00 | 12.00  | 13.00  | 14.00 | 10.00 | 12.00 | 10.96 |
| Spessartine                    | 1.00        | 1.00   | 2.00   | 3.00   | 5.00   | 1.00   | 1.00   | 2.00   | 2.00     | 2.00   | 2.00  | 4.00   | 3.00   | 1.00  | 2.00  | 1.00  | 2.05  |

**Table 2** Representative microprobe analyses of clinopyroxene. Cations based on 6 oxygens. Ferric iron was estimated using the method of Droop (1987). Endmembers follow Morimoto (1988).

| Sample                         | P04-47   | P04-47   | P05-01   | P05-01   | P05-01   | P05-01   |
|--------------------------------|----------|----------|----------|----------|----------|----------|
| point                          | 43       | 2        | 25       | 47       | 34       | 25       |
| Description                    | core     | rim      | core     | core     | rim      | rim      |
| SiO <sub>2</sub>               | 50.17    | 51.07    | 52.03    | 51.78    | 51.75    | 52.85    |
| TiO <sub>2</sub>               | 0.49     | 0.17     | 0.22     | 0.40     | 0.12     | 0.05     |
| Al <sub>2</sub> O <sub>3</sub> | 5.61     | 3.21     | 5.35     | 4.44     | 3.00     | 3.36     |
| Cr <sub>2</sub> O <sub>3</sub> | 0.04     | 0.00     | 0.02     | 0.00     | 0.00     | 0.00     |
| FeO                            | 13.74    | 11.10    | 10.18    | 11.52    | 9.56     | 9.67     |
| MnO                            | 0.16     | 0.13     | 0.11     | 0.00     | 0.12     | 0.11     |
| MgO                            | 8.46     | 11.03    | 9.70     | 9.93     | 11.44    | 11.59    |
| CaO                            | 19.27    | 21.15    | 19.23    | 20.60    | 22.64    | 21.40    |
| Na <sub>2</sub> O              | 2.63     | 1.73     | 2.56     | 1.78     | 1.10     | 1.39     |
| K <sub>2</sub> O               | 0.02     | 0.00     | 0.00     | 0.00     | 0.00     | 0.00     |
| Total                          | 100.59   | 99.59    | 99.39    | 100.45   | 99.72    | 100.42   |
| Formula                        |          |          |          |          |          |          |
| Si                             | 1.872    | 1.912    | 1.942    | 1.931    | 1.936    | 1.959    |
| Ti                             | 0.014    | 0.005    | 0.006    | 0.011    | 0.003    | 0.001    |
| Al                             | 0.247    | 0.142    | 0.235    | 0.195    | 0.132    | 0.147    |
| Cr                             | 0.001    | 0.000    | 0.001    | 0.000    | 0.000    | 0.000    |
| Fe <sup>3+</sup>               | 0.172    | 0.150    | 0.053    | 0.049    | 0.069    | 0.032    |
| Fe <sup>2+</sup>               | 0.257    | 0.198    | 0.265    | 0.310    | 0.230    | 0.268    |
| Mn                             | 0.005    | 0.004    | 0.003    | 0.000    | 0.004    | 0.003    |
| Mg                             | 0.471    | 0.616    | 0.540    | 0.552    | 0.638    | 0.640    |
| Ca                             | 0.770    | 0.848    | 0.769    | 0.823    | 0.907    | 0.850    |
| Na                             | 0.190    | 0.125    | 0.186    | 0.129    | 0.080    | 0.100    |
| K                              | 0.001    | 0.000    | 0.000    | 0.000    | 0.000    | 0.000    |
| Total                          | 4        | 4        | 4        | 4        | 4        | 4        |
| Mg/(Mg+Fe <sup>2+</sup> )      | 0.647    | 0.757    | 0.671    | 0.640    | 0.735    | 0.705    |
| Endmembers                     |          |          |          |          |          |          |
| Enstatite                      | 0.314    | 0.370    | 0.343    | 0.328    | 0.359    | 0.364    |
| Ferrosillite                   | 0.172    | 0.119    | 0.168    | 0.184    | 0.130    | 0.152    |
| Wollastonite                   | 0.514    | 0.510    | 0.489    | 0.488    | 0.511    | 0.483    |
| Name                           | diopside | diopside | diopside | diopside | diopside | diopside |

**Table 3** Representative microprobe analyses of amphibole. Formulas calculated on a 23 oxygen basis after Tindle and Webb (1994).

| Sample                                   | P0-47b                          | P0-47b                          | P05-01                                  | P05-01                                  | P05-01                                      |
|------------------------------------------|---------------------------------|---------------------------------|-----------------------------------------|-----------------------------------------|---------------------------------------------|
| Point                                    | 6                               | 20                              | 16                                      | 32                                      | 43                                          |
| SiO <sub>2</sub>                         | 40.563                          | 40.567                          | 41.702                                  | 42.641                                  | 42.933                                      |
| TiO <sub>2</sub>                         | 0.936                           | 0.752                           | 1.378                                   | 1.226                                   | 1.090                                       |
| Al <sub>2</sub> O <sub>3</sub>           | 12.665                          | 12.990                          | 11.704                                  | 11.651                                  | 11.159                                      |
| Cr <sub>2</sub> O <sub>3</sub>           | 0.037                           | 0.016                           | 0.106                                   | 0.000                                   | 0.009                                       |
| FeO                                      | 20.247                          | 19.634                          | 19.061                                  | 16.928                                  | 18.039                                      |
| MnO                                      | 0.204                           | 0.300                           | 0.112                                   | 0.100                                   | 0.036                                       |
| MgO                                      | 8.196                           | 8.285                           | 8.765                                   | 10.323                                  | 9.657                                       |
| CaO                                      | 11.233                          | 11.924                          | 11.552                                  | 11.896                                  | 11.619                                      |
| Na <sub>2</sub> O                        | 1.410                           | 1.326                           | 1.461                                   | 1.407                                   | 1.259                                       |
| K <sub>2</sub> O                         | 1.667                           | 1.647                           | 1.715                                   | 1.684                                   | 1.447                                       |
| Total                                    | 97.158                          | 97.441                          | 97.555                                  | 97.856                                  | 97.247                                      |
| Formula                                  |                                 |                                 |                                         |                                         |                                             |
| Si                                       | 6.166                           | 6.170                           | 6.331                                   | 6.377                                   | 6.459                                       |
| Al iv                                    | 1.834                           | 1.830                           | 1.669                                   | 1.623                                   | 1.541                                       |
| Al vi                                    | 0.435                           | 0.499                           | 0.425                                   | 0.431                                   | 0.437                                       |
| Ti                                       | 0.107                           | 0.086                           | 0.157                                   | 0.138                                   | 0.123                                       |
| Cr                                       | 0.000                           | 0.000                           | 0.000                                   | 0.000                                   | 0.000                                       |
| Fe <sup>3+</sup>                         | 0.786                           | 0.561                           | 0.410                                   | 0.375                                   | 0.468                                       |
| Fe <sup>2+</sup>                         | 1.788                           | 1.936                           | 2.010                                   | 1.742                                   | 1.802                                       |
| Mn                                       | 0.026                           | 0.039                           | 0.014                                   | 0.013                                   | 0.005                                       |
| Mg                                       | 1.857                           | 1.879                           | 1.984                                   | 2.301                                   | 2.166                                       |
| Ca                                       | 1.830                           | 1.943                           | 1.879                                   | 1.906                                   | 1.873                                       |
| Na                                       | 0.416                           | 0.391                           | 0.430                                   | 0.408                                   | 0.367                                       |
| K                                        | 0.323                           | 0.320                           | 0.332                                   | 0.321                                   | 0.278                                       |
| OH*                                      | 2.000                           | 2.000                           | 2.000                                   | 2.000                                   | 2.000                                       |
| Total                                    | 17.568                          | 17.654                          | 17.641                                  | 17.635                                  | 17.517                                      |
| Amphibole group                          | Ca                              | Ca                              | Ca                                      | Ca                                      | Ca                                          |
| (Ca+Na) (B)                              | 2                               | 2                               | 2                                       | 2                                       | 2                                           |
| Na (B)                                   | 0.170                           | 0.057                           | 0.121                                   | 0.094                                   | 0.127                                       |
| (Na+K) (A)                               | 0.568                           | 0.654                           | 0.641                                   | 0.635                                   | 0.517                                       |
| Mg/(Mg+Fe <sup>2+</sup> )                | 0.510                           | 0.492                           | 0.497                                   | 0.569                                   | 0.546                                       |
| Fe <sup>3</sup> /(Fe <sup>3</sup> +Alvi) | 0.644                           | 0.529                           | 0.491                                   | 0.465                                   | 0.517                                       |
| Sum of S2                                | 13                              | 13                              | 13                                      | 13                                      | 13                                          |
| Amphibole names                          | potassian-magnesian hastingsite | potassian-magnesian hastingsite | potassian-ferroan pargasitic hornblende | potassian-ferroan pargasitic hornblende | potassian-magnesian hastingsitic hornblende |

**Table 4** Representative microprobe analyses of biotite. Cations based on 22 oxygens.

| Sample                         | Cpx-bearing |        |        |        | Cpx-free |        |        |        |        |        |        |        |        |        |        |
|--------------------------------|-------------|--------|--------|--------|----------|--------|--------|--------|--------|--------|--------|--------|--------|--------|--------|
|                                | P04-47      |        | P05-01 |        | P04-48   |        |        |        |        |        | P10-9  |        |        |        |        |
| Description                    | matrix      | on grt | on grt | in Grt | matrix   | on Cpx | on Cpx | on Grt | on Grt | in Grt | matrix | on Grt | on Grt | on Grt | on Grt |
| Point                          | 35          | 9      | 19     | 28     | 47       | 64     | 84     | 6      | 54     | 56     | 43     | 15     | 68     | 19     | 25     |
| SiO <sub>2</sub>               | 36.526      | 36.278 | 35.414 | 36.496 | 36.271   | 36.795 | 37.037 | 35.589 | 36.016 | 37.568 | 35.690 | 35.095 | 36.254 | 34.851 | 34.730 |
| TiO <sub>2</sub>               | 4.757       | 2.894  | 3.190  | 3.449  | 4.199    | 3.322  | 3.960  | 4.395  | 2.608  | 5.218  | 4.252  | 4.562  | 4.919  | 4.038  | 3.380  |
| Al <sub>2</sub> O <sub>3</sub> | 13.687      | 15.667 | 14.662 | 14.325 | 13.871   | 14.416 | 14.489 | 14.773 | 15.294 | 14.422 | 14.437 | 14.499 | 14.823 | 14.964 | 14.990 |
| Cr <sub>2</sub> O <sub>3</sub> | 0.015       | 0.019  | 0.045  | 0.007  | 0.000    | 0.000  | 0.000  | 0.074  | 0.000  | 0.000  | 0.029  | 0.056  | 0.020  | 0.000  |        |
| FeO                            | 20.808      | 20.218 | 21.088 | 18.880 | 19.522   | 17.992 | 17.272 | 20.520 | 21.891 | 18.054 | 22.269 | 22.718 | 20.346 | 23.040 | 24.560 |
| MnO                            | 0.035       | 0.127  | 0.099  | 0.008  | 0.003    | 0.027  | 0.000  | 0.064  | 0.201  | 0.015  | 0.077  | 0.052  | 0.099  | 0.000  | 0.000  |
| MgO                            | 10.731      | 11.034 | 10.772 | 11.781 | 11.215   | 12.858 | 13.128 | 10.339 | 11.199 | 11.545 | 9.751  | 9.592  | 9.933  | 8.669  | 7.790  |
| CaO                            | 0.014       | 0.055  | 0.015  | 0.000  | 0.035    | 0.085  | 0.087  | 0.039  | 0.047  | 0.000  | 0.041  | 0.000  | 0.032  | 0.029  | 0.090  |
| Na <sub>2</sub> O              | 0.084       | 0.069  | 0.032  | 0.059  | 0.063    | 0.055  | 0.093  | 0.099  | 0.000  | 0.139  | 0.024  | 0.023  | 0.100  | 0.331  | 0.000  |
| K <sub>2</sub> O               | 9.934       | 10.073 | 9.333  | 9.927  | 9.635    | 9.952  | 10.006 | 9.877  | 9.000  | 9.614  | 9.786  | 9.531  | 9.587  | 9.360  | 9.150  |
| Total                          | 96.591      | 96.434 | 94.650 | 94.931 | 94.813   | 95.502 | 96.072 | 95.769 | 96.255 | 96.575 | 96.356 | 96.128 | 96.113 | 95.281 | 94.690 |
| Formula                        |             |        |        |        |          |        |        |        |        |        |        |        |        |        |        |
| Si                             | 5.498       | 5.453  | 5.463  | 5.533  | 5.526    | 5.513  | 5.491  | 5.422  | 5.477  | 5.527  | 5.443  | 5.390  | 5.463  | 5.413  | 5.459  |
| Al iv                          | 2.428       | 2.547  | 2.537  | 2.467  | 2.474    | 2.487  | 2.509  | 2.578  | 2.523  | 2.473  | 2.557  | 2.610  | 2.537  | 2.587  | 2.541  |
| Al vi                          | 0.000       | 0.228  | 0.129  | 0.093  | 0.017    | 0.059  | 0.023  | 0.076  | 0.028  | 0.028  | 0.038  | 0.015  | 0.095  | 0.152  | 0.236  |
| Ti                             | 0.539       | 0.327  | 0.370  | 0.393  | 0.481    | 0.374  | 0.442  | 0.504  | 0.463  | 0.577  | 0.488  | 0.527  | 0.557  | 0.472  | 0.400  |
| Cr                             | 0.002       | 0.002  | 0.005  | 0.001  | 0.000    | 0.000  | 0.000  | 0.009  | 0.012  | 0.000  | 0.003  | 0.007  | 0.002  | 0.000  | 0.000  |
| Fe                             | 2.619       | 2.541  | 2.721  | 2.394  | 2.487    | 2.255  | 2.142  | 2.615  | 2.638  | 2.221  | 2.840  | 2.918  | 2.564  | 2.993  | 3.228  |
| Mn                             | 0.004       | 0.016  | 0.013  | 0.001  | 0.000    | 0.003  | 0.000  | 0.008  | 0.010  | 0.002  | 0.010  | 0.007  | 0.013  | 0.000  | 0.000  |
| Mg                             | 2.408       | 2.472  | 2.477  | 2.662  | 2.547    | 2.872  | 2.901  | 2.348  | 2.464  | 2.532  | 2.217  | 2.196  | 2.231  | 2.007  | 1.825  |
| Ca                             | 0.002       | 0.009  | 0.002  | 0.000  | 0.006    | 0.014  | 0.014  | 0.006  | 0.007  | 0.000  | 0.007  | 0.000  | 0.005  | 0.005  | 0.015  |
| Na                             | 0.025       | 0.020  | 0.010  | 0.017  | 0.019    | 0.016  | 0.027  | 0.029  | 0.018  | 0.040  | 0.007  | 0.007  | 0.029  | 0.100  | 0.000  |
| K                              | 1.907       | 1.931  | 1.836  | 1.920  | 1.873    | 1.902  | 1.892  | 1.919  | 1.859  | 1.804  | 1.904  | 1.867  | 1.843  | 1.854  | 1.834  |
| OH*                            | 4           | 4      | 4      | 4      | 4        | 4      | 4      | 4      | 4      | 4      | 4      | 4      | 4      | 4      | 4      |
| TOTAL                          | 19.996      | 20.067 | 19.944 | 20.043 | 19.956   | 20.102 | 20.082 | 19.920 | 19.936 | 19.931 | 19.937 | 19.865 | 19.857 | 19.863 | 19.802 |
| Mg/(Mg+Fe)                     | 0.48        | 0.49   | 0.48   | 0.53   | 0.51     | 0.56   | 0.58   | 0.47   | 0.48   | 0.53   | 0.44   | 0.43   | 0.47   | 0.40   | 0.36   |

**Table 5** Representative microprobe analyses of feldspars. Abbreviations used: ic – inclusion in clinopyroxene; ig – inclusion in garnet; L – large grain; m – microgranular; e – exsolution.

| Sample                         | Cpx-bearing |        |        |        |             |       |        |        |       |       |            |        |        |       |       |       |       |
|--------------------------------|-------------|--------|--------|--------|-------------|-------|--------|--------|-------|-------|------------|--------|--------|-------|-------|-------|-------|
|                                | P04-47      |        |        |        |             |       |        | P05-01 |       |       |            |        |        |       |       |       |       |
| Mineral                        | Plagioclase |        |        |        | Plagioclase |       |        |        |       |       | K-feldspar |        |        |       |       |       |       |
| Point                          | 29ic        | 24ig   | 18L    | 10m    | 16m         | 26m   | 31ic   | 3ic    | 79L   | 19m   | 74m        | 71e    | 89e    | 68L   | 90L   | 72m   | 73m   |
| SiO <sub>2</sub>               | 65.04       | 64.59  | 64.82  | 63.69  | 62.86       | 64.99 | 63.89  | 65.35  | 64.13 | 64.87 | 64.06      | 63.1   | 64.85  | 64.66 | 64.01 | 64.19 | 64.08 |
| TiO <sub>2</sub>               | 0.00        | 0.00   | 0.00   | 0.00   | 0.00        | 0.00  | 0.00   | 0.00   | 0.00  | 0.00  | 0.01       | 0.00   | 0.00   | 0.04  | 0.02  | 0.00  | 0.08  |
| Al <sub>2</sub> O <sub>3</sub> | 22.11       | 22.15  | 22.03  | 23.07  | 22.87       | 22.14 | 22.41  | 21.51  | 22.22 | 21.48 | 22.85      | 23.19  | 22.42  | 18.66 | 18.6  | 18.61 | 18.59 |
| FeO                            | 0.17        | 0.20   | 0.12   | 0.44   | 0.40        | 0.13  | 0.16   | 0.22   | 0.25  | 0.31  | 0.01       | 0.07   | 0.02   | 0.07  | 0.03  | 0.00  | 0.08  |
| MnO                            | 0.00        | 0.00   | 0.00   | 0.00   | 0.00        | 0.00  | 0.00   | 0.00   | 0.03  | 0.00  | 0.00       | 0.00   | 0.00   | 0.04  | 0.00  | 0.04  | 0.00  |
| MgO                            | 0.00        | 0.00   | 0.01   | 0.03   | 0.00        | 0.01  | 0.00   | 0.01   | 0.00  | 0.00  | 0.00       | 0.01   | 0.00   | 0.01  | 0.00  | 0.01  | 0.00  |
| CaO                            | 3.43        | 3.3    | 3.29   | 4.48   | 4.27        | 3.38  | 3.73   | 3.16   | 3.26  | 3.25  | 3.68       | 4.21   | 3.05   | 0.00  | 0.10  | 0.02  | 0.03  |
| Na <sub>2</sub> O              | 9.59        | 9.74   | 10.10  | 9.09   | 9.39        | 9.73  | 9.25   | 9.22   | 9.30  | 9.40  | 9.62       | 9.35   | 9.80   | 1.73  | 1.48  | 1.57  | 1.15  |
| K <sub>2</sub> O               | 0.59        | 0.58   | 0.24   | 0.19   | 0.21        | 0.39  | 0.57   | 0.43   | 0.41  | 0.36  | 0.17       | 0.21   | 0.19   | 14.76 | 15.42 | 15.26 | 15.13 |
| BaO                            | 0.04        | 0.02   | 0.01   | 0.09   | 0.00        | 0.04  | nd     | nd     | nd    | nd    | nd         | nd     | nd     | nd    | nd    | nd    | nd    |
| Total                          | 100.96      | 100.57 | 100.61 | 101.09 | 100.00      | 100.8 | 100.01 | 99.9   | 99.61 | 99.67 | 100.39     | 100.14 | 100.33 | 99.96 | 99.66 | 99.7  | 99.14 |
| An                             | 15.94       | 15.25  | 15.05  | 21.16  | 19.85       | 15.74 | 17.61  | 15.54  | 15.83 | 15.71 | 17.28      | 19.69  | 14.53  | 0     | 0.46  | 0.09  | 0.15  |
| Ab                             | 80.71       | 81.52  | 83.64  | 77.59  | 79.00       | 82.01 | 79.16  | 81.93  | 81.79 | 82.24 | 81.78      | 79.13  | 84.38  | 15.13 | 12.68 | 13.53 | 10.32 |
| Or                             | 3.28        | 3.2    | 1.3    | 1.09   | 1.15        | 2.18  | 3.23   | 2.53   | 2.38  | 2.05  | 0.94       | 1.18   | 1.09   | 84.87 | 86.86 | 86.38 | 89.53 |
| Cn                             | 0.06        | 0.03   | 0.01   | 0.16   | 0.00        | 0.07  | nd     | nd     | nd    | nd    | nd         | nd     | nd     | nd    | nd    | nd    | nd    |

**Table 5** continued.

| Cpx-free                       |             |       |        |        |        |            |        |        |        |       |             |        |        |       |       |            |       |       |       |  |
|--------------------------------|-------------|-------|--------|--------|--------|------------|--------|--------|--------|-------|-------------|--------|--------|-------|-------|------------|-------|-------|-------|--|
| Sample                         | P04-48      |       |        |        |        |            |        |        |        |       | P10-9       |        |        |       |       |            |       |       |       |  |
| Mineral                        | Plagioclase |       |        |        |        | K-feldspar |        |        |        |       | Plagioclase |        |        |       |       | K-feldspar |       |       |       |  |
| Point                          | 33ig        | 60L   | 65L    | 17m    | 21m    | 47L        | 50L    | 51e    | 24m    | 64m   | 15ig        | 3L     | 7L     | 23m   | 31m   | 27e        | 26L   | 29L   | 30m   |  |
| SiO <sub>2</sub>               | 66.23       | 64.43 | 66.57  | 64.18  | 64.31  | 65.25      | 65.74  | 65.37  | 64.72  | 63.84 | 65.54       | 64.4   | 65.15  | 63.36 | 65.02 | 65.52      | 64.45 | 63.8  | 63.85 |  |
| TiO <sub>2</sub>               | 0.00        | 0.00  | 0.00   | 0.00   | 0.00   | 0.00       | 0.00   | 0.00   | 0.00   | 0.00  | 0.09        | 0.00   | 0.00   | 0.00  | 0.06  | 0.00       | 0.12  | 0.03  | 0.00  |  |
| Al <sub>2</sub> O <sub>3</sub> | 21.33       | 21.67 | 21.44  | 22.2   | 22.57  | 18.7       | 18.76  | 18.67  | 18.47  | 18.26 | 21.49       | 22.81  | 21.99  | 22.75 | 21.87 | 21.17      | 18.65 | 18.36 | 18.22 |  |
| FeO                            | 0.42        | 0.35  | 0.27   | 0.34   | 0.33   | 0.04       | 0.01   | 0.04   | 0.00   | 0.07  | 0.17        | 0.17   | 0.39   | 0.58  | 0.00  | 0.00       | 0.00  | 0.00  | 0.06  |  |
| MnO                            | 0.00        | 0.00  | 0.00   | 0.00   | 0.00   | 0.00       | 0.00   | 0.00   | 0.00   | 0.00  | 0.00        | 0.00   | 0.00   | 0.00  | 0.00  | 0.00       | 0.00  | 0.00  | 0.00  |  |
| MgO                            | 0.01        | 0.04  | 0.00   | 0.00   | 0.00   | 0.00       | 0.00   | 0.02   | 0.01   | 0.01  | 0.00        | 0.00   | 0.00   | 0.00  | 0.00  | 0.00       | 0.00  | 0.00  | 0.00  |  |
| CaO                            | 2.75        | 3.17  | 2.47   | 3.55   | 3.67   | 0.05       | 0.07   | 0.04   | 0.06   | 0.01  | 2.81        | 3.20   | 2.63   | 3.84  | 2.56  | 2.31       | 0.00  | 0.00  | 0.00  |  |
| Na <sub>2</sub> O              | 10.51       | 9.91  | 10.29  | 9.69   | 9.65   | 1.75       | 1.46   | 1.26   | 1.62   | 0.5   | 10.43       | 9.79   | 10.03  | 8.94  | 10.35 | 10.52      | 1.30  | 1.43  | 0.87  |  |
| K <sub>2</sub> O               | 0.32        | 0.35  | 0.44   | 0.25   | 0.17   | 14.91      | 15.36  | 15.41  | 15.08  | 16.33 | 0.12        | 0.40   | 0.09   | 0.12  | 0.14  | 0.23       | 15.11 | 14.77 | 15.33 |  |
| BaO                            | 0.01        | 0.04  | 0.08   | 0.08   | 0.02   | 0.23       | 0.20   | 0.37   | 0.35   | 0.66  | 0.00        | 0.24   | 0.01   | 0.41  | 0.00  | 0.02       | 0.36  | 0.32  | 0.06  |  |
| Total                          | 101.58      | 99.95 | 101.56 | 100.28 | 100.71 | 100.93     | 101.59 | 101.17 | 100.32 | 99.69 | 100.65      | 101.01 | 100.29 | 100.0 | 100   | 99.77      | 99.99 | 98.71 | 98.39 |  |
| An                             | 12.40       | 14.71 | 11.41  | 16.58  | 17.19  | 0.25       | 0.33   | 0.20   | 0.29   | 0.05  | 12.87       | 14.90  | 12.59  | 18.91 | 11.93 | 10.68      | 0.00  | 0.00  | 0.00  |  |
| Ab                             | 85.87       | 83.28 | 86.03  | 81.92  | 81.84  | 15.07      | 12.54  | 10.96  | 13.93  | 4.38  | 86.47       | 82.48  | 86.88  | 79.65 | 87.29 | 88.02      | 11.49 | 12.76 | 7.93  |  |
| Or                             | 1.71        | 1.94  | 2.43   | 1.37   | 0.93   | 84.27      | 86.79  | 88.2   | 85.17  | 94.39 | 0.65        | 2.22   | 0.51   | 0.7   | 0.78  | 1.27       | 87.87 | 86.67 | 91.96 |  |
| Cn                             | 0.01        | 0.06  | 0.13   | 0.14   | 0.03   | 0.4        | 0.35   | 0.64   | 0.61   | 1.18  | 0.00        | 0.41   | 0.02   | 0.74  | 0.00  | 0.03       | 0.64  | 0.58  | 0.11  |  |

## References

- Droop, G.T.B. (1987). A general equation for estimating Fe<sup>3+</sup> concentrations in ferromagnesian silicates and oxides from microprobe analyses, using stoichiometric criteria. *Mineralogical Magazine*, 51, 431–435.
- Morimoto, M. (1988). Nomenclature of pyroxenes. *Mineralogical Magazine*, 52, 535–550.
- Tindle, A.G., & Webb, P.C. (1994). Probe-AMPH—A spreadsheet program to classify microprobe-derived amphibole analyses. *Computers and Geosciences*, 20, 1201–1228.
