# Supplementary material
Source: Oxford University Press journal article supplement (doi:10.1051/bsgf_2017195)
Supplement: bsgf_2017_188_6_170006-1-olm.zip [file bsgf_2017_188_6_170006-1-olm.zip]

Archive with 8 entries (7 files):
- bsgf170006-1-olm/
- bsgf170006-1-olm/GAUTIER-graphic_abstract.jpg
- bsgf170006-1-olm/GAUTIER-Supplement1.pdf
- bsgf170006-1-olm/GAUTIER-Supplement2.pdf
- bsgf170006-1-olm/GAUTIER-Supplement3.pdf
- bsgf170006-1-olm/GAUTIER-Supplement4.xls
- bsgf170006-1-olm/GAUTIER-Supplement5.pdf
- bsgf170006-1-olm/GAUTIER-Supplement6.xls
