# Supplementary material
Source: Oxford University Press journal article supplement (doi:10.1051/bsgf_2017195)
Supplement: bsgf_2017_188_6_170006-1-olm.zip [file bsgf_2017_188_6_170006-1-olm.zip › bsgf170006-1-olm/GAUTIER-Supplement4.xls]

## Sheet: P10-10 zr
		Isotopic ratios		Ages (Ma)		Isotopic ratios		Ages (Ma)		Content
Analysis	sample	206Pb/238U	2σ (%)	206Pb/238U	2σ	207Pb/235U	2σ (%)	207Pb/235U	2σ	Pb(ppm)	Th(ppm)	U(ppm)	Th/U
07190511a	P10-10-1 c	0.02195	2.09567	140	2.94	0.14607	2.64257	138.4	3.42	22.386	139.168	1080.4	0.128812
08190511a	P10-10-1 c	0.02135	2.15457	136.2	2.94	0.14495	3.2425	137.4	4.18	11.6497	68.0746	579.856	0.117399
09190511a	P10-10-1 ir	0.02198	2.09281	140.1	2.92	0.14726	2.58047	139.5	3.36	30.0102	248.157	1426.12	0.174009
10190511a	P10-10-1 er	0.0217	2.11982	138.4	2.92	0.14476	2.79083	137.3	3.58	14.9081	83.9043	730.133	0.114916
11190511a	P10-10-2 er	0.02163	2.12668	137.9	2.94	0.14788	3.07006	140	4.02	11.2874	52.053	560.269	0.0929071
12190511a	P10-10-2 c	0.02201	2.08996	140.3	2.92	0.14836	2.54786	140.5	3.34	27.0605	145.995	1313.72	0.111131
13190511a	P10-10-2 er	0.01989	2.11161	127	2.64	0.13388	2.49477	127.6	2.98	34.1695	271.625	1813.88	0.149748
17190511a	P10-10-3 ir	0.02179	2.11106	139	2.92	0.14627	2.74834	138.6	3.56	22.1235	78.6298	1095.38	0.0717834
18190511a	P10-10-3 er	0.01997	2.10315	127.5	2.68	0.13648	2.82825	129.9	3.44	18.3624	94.7542	981.683	0.0965221
19190511a	P10-10-4 c	0.02157	2.13259	137.6	2.9	0.14537	2.82039	137.8	3.64	16.0286	79.6177	794.714	0.100184
20190511a	P10-10-4 ir	0.02171	2.11884	138.5	2.88	0.14784	2.63799	140	3.46	22.5179	141.396	1097.73	0.128807
21190511a	P10-10-7 ir	0.02161	2.12864	137.8	2.86	0.14555	2.5833	138	3.34	25.9358	162.945	1275.95	0.127705
22190511a	P10-10-7 c	0.02148	2.14153	137	2.9	0.14447	3.03177	137	3.88	12.1426	49.8498	610.106	0.0817067
23190511a	P10-10-7 er	0.02127	2.06864	135.7	2.84	0.14577	2.74405	138.2	3.54	19.8681	81.7976	1006.79	0.0812462
24190511a	P10-10-8 er	0.02106	2.08927	134.3	2.8	0.14263	2.67826	135.4	3.4	21.226	137.63	1071.02	0.128504
27190511a	P10-10-8 ir	0.02248	2.13523	143.3	2.98	0.15164	2.70377	143.4	3.62	20.4591	126.707	965.507	0.131234
28190511a	P10-10-8 c	0.02155	2.13457	137.4	2.86	0.14396	2.63962	136.6	3.38	24.9123	126.065	1235.27	0.102055
30190511a	P10-10-11 c	0.02038	2.06084	130.1	2.68	0.13651	2.49066	129.9	3.04	42.9105	176.451	2261.2	0.0780342
31190511a	P10-10-11 ir	0.01986	2.1148	126.8	2.66	0.13389	2.82321	127.6	3.38	25.2671	138.596	1366.41	0.101431
32190511a	P10-10-11 er	0.02015	2.08437	128.6	2.68	0.13752	2.70506	130.8	3.32	20.2374	107.291	1077.33	0.0995899
33190511a	P10-10-12 c	0.02222	2.07021	141.7	2.92	0.14802	2.58073	140.2	3.38	30.1339	168.421	1448.54	0.11627
34190511a	P10-10-12 ir	0.02154	2.13556	137.4	2.86	0.14548	2.69453	137.9	3.48	21.0741	112.337	1048.6	0.107131
37190511a	P10-10-14 c	0.0206	2.13592	131.4	2.72	0.13968	2.70619	132.8	3.36	33.9108	57.6449	1801.38	0.0320005
38190511a	P10-10-14 c	0.02166	2.12373	138.1	2.84	0.14424	2.57903	136.8	3.3	36.3728	247.291	1782.98	0.138695
39190511a	P10-10-14 ir	0.02182	2.10816	139.2	2.88	0.14708	2.73321	139.3	3.56	19.789	107.791	968.402	0.111308
40190511a	P10-10-14 er	0.02043	2.1537	130.4	2.72	0.13789	2.84285	131.2	3.5	16.5272	99.3764	862.214	0.115257
41190511a	P10-10-17 c	0.02119	2.07645	135.2	2.8	0.14018	2.78214	133.2	3.46	21.7267	140.632	1092.79	0.128691
43190511a	P10-10-17 er	0.02049	2.14739	130.8	2.8	0.13518	3.38808	128.7	4.1	8.43961	43.0047	443.706	0.0969215
47190511a	P10-10-23 c	0.02237	2.05633	142.6	2.94	0.15019	2.62334	142.1	3.48	32.0914	197.887	1525.07	0.129756
48190511a	P10-10-23 er	0.02158	2.1316	137.7	2.9	0.14306	3.15951	135.8	4.02	16.9428	80.0176	841.933	0.0950403
49190511a	P10-10-26 c	0.02175	2.11494	138.7	2.86	0.14717	2.65	139.4	3.46	27.8902	219.139	1340.98	0.163417
50190511a	P10-10-26 er	0.02023	2.07612	129.1	2.7	0.13857	3.00209	131.8	3.7	14.6301	109.283	765.545	0.142752
51190511a	P10-10-26 er	0.02029	2.06999	129.5	2.68	0.13912	2.76021	132.3	3.42	18.3179	164.389	948.348	0.173342
52190511a	P10-10-26 er	0.02131	2.15861	136	2.86	0.14112	3.08957	134	3.88	12.1142	63.0251	609.742	0.103364
54190511a	P10-10-32 c	0.02953	2.30274	187.6	4.3	0.19421	4.63416	180.2	7.66	14.4928	15.8111	536.243	0.0294849
57190511a	P10-10-32 er	0.02248	2.04626	143.3	2.96	0.15043	2.72552	142.3	3.62	20.0292	87.1368	958.282	0.0909302
61190511a	P10-10-41 ir	0.02233	2.06001	142.4	2.9	0.14903	2.56324	141.1	3.38	30.624	59.8334	1495.54	0.040008
62190511a	P10-10-42 c	0.02186	2.01281	139.4	2.84	0.14942	2.48963	141.4	3.3	75.2261	459.992	3643.85	0.126238
63190511a	P10-10-42 ir	0.02054	2.04479	131.1	2.7	0.13649	2.71082	129.9	3.3	31.2515	223.014	1606.73	0.138799
64190511a	P10-10-42 er	0.01844	2.06074	117.8	2.46	0.11953	3.06199	114.6	3.32	15.1262	109.555	871.342	0.125732
67190511a	P10-10-56 c	0.02233	2.06001	142.4	2.94	0.14906	2.84449	141.1	3.74	27.7806	113.678	1336.31	0.0850679
68190511a	P10-10-56 ir	0.02166	2.03139	138.1	2.82	0.14511	2.7014	137.6	3.46	23.5053	141.14	1148.28	0.122914
69190511a	P10-10-58 c	0.02857	2.24011	181.6	4.04	0.19415	4.23384	180.2	7	31.2122	62.9846	1164.8	0.0540735
70190511a	P10-10-58 ir	0.02143	2.0532	136.7	2.8	0.14382	2.6561	136.4	3.4	27.7349	195.659	1362.27	0.143626
72190511a	P10-10-73 c	0.02368	2.11149	150.9	3.1	0.15785	2.83814	148.8	3.92	22.7945	32.8661	1044.36	0.0314699
73190511a	P10-10-73 ir	0.02072	2.12355	132.2	2.74	0.14045	2.97615	133.4	3.72	24.176	41.2755	1266.31	0.0325952
Discordant data
53190511a	P10-10-32 c	0.04064	2.26378	256.8	5.72	0.26712	4.29021	240.4	9.18	23.7386	20.2312	635.567	0.0318317
59190511a	P10-10-36	0.03294	2.18579	208.9	4.44	0.21138	3.46296	194.7	6.14	27.101	40.1231	890.414	0.0450612
42190511a	P10-10-17 ir	0.02081	2.11437	132.8	2.8	0.14883	2.96983	140.9	3.9	12.8861	61.5126	660.315	0.0931564
	c : core
	ir : internal rim
	er : external rim

## Sheet: P10-10 monazites
		Isotopic ratios		Ages (Ma)		Isotopic ratios		Ages (Ma)		Isotopic ratios		Ages (Ma)		Content
Analysis	sample	208Pb/232Th	2σ (%)	208Pb/232Th	2σ	206Pb/238U	2σ (%)	206Pb/238U	2σ	207Pb/235U	2σ (%)	207Pb/235U	2σ	Pb(ppm)	Th(ppm)	U(ppm)	Th/U
07190511b	Mona 1 ir	0.00663	2.41327	133.5	3.16	0.02136	2.62172	136.2	3.54	0.13783	3.1343	131.1	4	628.93	99729.7	4460.72	22.3573
08190511b	Mona 1 c	0.0066	2.42424	133	3.14	0.02121	2.64026	135.3	3.52	0.14218	3.13687	135	4	646.678	102271	4921.65	20.7799
09190511b	Mona 1 er	0.00604	2.31788	121.6	2.88	0.01953	2.66257	124.7	3.26	0.1318	3.29287	125.7	4	488.934	85006.5	3767.66	22.5622
11190511b	Mona 1 er	0.00553	2.53165	111.4	2.66	0.01815	2.97521	115.9	3.44	0.19012	5.081	176.7	8.24	587.23	110906	5515.51	20.108
12190511b	Mona 2 c	0.00657	2.43531	132.3	3.12	0.02135	2.62295	136.2	3.56	0.14671	3.43535	139	4.46	425.289	69075	2642.15	26.1435
16190511b	Mona 2 c	0.00679	2.35641	136.9	3.22	0.02211	2.7137	141	3.76	0.14933	4.13849	141.3	5.46	425.59	66319.4	2684.81	24.7017
17190511b	Mona 3 c	0.0063	2.22222	127	2.98	0.02054	2.72639	131.1	3.5	0.1391	4.11215	132.2	5.1	649.314	111140	3182.34	34.9241
18190511b	Mona 3 c	0.00677	2.36337	136.3	3.2	0.02192	2.64599	139.8	3.66	0.14536	3.82499	137.8	4.92	562.074	90248.7	2680.98	33.6626
20190511b	Mona 3 c	0.00684	2.33918	137.7	3.22	0.02241	2.58813	142.9	3.7	0.14259	3.67487	135.3	4.64	603.154	95624.3	2845.37	33.607
21190511b	Mona 4 c	0.00679	2.35641	136.7	3.2	0.02143	2.61316	136.7	3.48	0.14279	3.15148	135.5	4	484.172	74388.5	4025.71	18.4783
24190511b	Mona 4 er	0.00659	2.42792	132.7	3.1	0.02149	2.60586	137.1	3.5	0.14292	3.34453	135.6	4.26	462.919	74188.3	3211.85	23.0983
25190511b	Mona 4 c	0.00665	2.40602	133.9	3.12	0.02179	2.56999	138.9	3.52	0.14484	3.21734	137.3	4.12	453.473	70890.9	3673.63	19.2972
27190511b	Mona 5 c	0.00644	2.48447	129.8	3.02	0.02038	2.55152	130.1	3.3	0.13494	3.24589	128.5	3.92	522.426	84718.8	4196.48	20.1881
28190511b	Mona 5 er	0.00665	2.40602	133.9	3.1	0.02073	2.50844	132.2	3.32	0.14172	3.11883	134.6	3.92	500.792	78534.8	4374.04	17.9548
29190511b	Mona 5 c	0.00665	2.40602	133.9	3.1	0.02126	2.53998	135.6	3.42	0.14152	3.20803	134.4	4.04	543.512	85575.5	4391.27	19.4876
30190511b	Mona 5 er	0.00609	2.29885	122.7	2.84	0.01944	2.57202	124.1	3.16	0.1452	3.4022	137.7	4.38	574.86	99227.5	4765.2	20.8234
31190511b	Mona 5 er	0.0067	2.38806	135	3.12	0.02147	2.51514	137	3.44	0.14428	3.14666	136.8	4.02	584.917	91390.6	4578.55	19.9606
34190511b	Mona 6 c	0.00708	2.25989	142.7	3.3	0.02286	2.53718	145.7	3.64	0.15574	3.19764	147	4.38	828.192	125662	4054.01	30.9969
35190511b	Mona 6 er	0.00716	2.23464	144.2	3.32	0.02321	2.49892	147.9	3.7	0.16156	3.28051	152.1	4.64	677.72	102086	3007.34	33.9456
36190511b	Mona 6 c	0.00689	2.32221	138.7	3.2	0.02234	2.50671	142.4	3.58	0.15576	3.38983	147	4.64	540.911	84420.7	2619.21	32.2314
39190511b	Mona 7 c	0.00691	2.31548	139.1	3.2	0.02174	2.4839	138.6	3.42	0.14186	3.07345	134.7	4	489.122	70731.5	5769.66	12.2592
40190511b	Mona 7 c	0.00689	2.32221	138.8	3.2	0.02178	2.47934	138.9	3.42	0.142	3.04225	134.8	4	473.119	68898.9	5348.61	12.8817
44190511b	Mona 8 c	0.0069	2.31884	139	3.18	0.0216	2.5	137.8	3.38	0.14211	3.09619	134.9	3.92	479.097	69646.7	5297.14	13.148
45190511b	Mona 8 c	0.00682	2.34604	137.4	3.14	0.02195	2.55125	140	3.5	0.15069	3.53043	142.5	4.7	628.077	99480.5	2848.83	34.9197
46190511b	Mona 8 c	0.00627	2.23285	126.3	2.88	0.02032	2.55906	129.7	3.26	0.13945	3.67157	132.6	4.56	588.362	101309	2894.31	35.0028
49190511b	Mona 9 c	0.00632	2.21519	127.3	2.9	0.01977	2.42792	126.2	3.08	0.13479	3.16047	128.4	3.82	931.436	159073	5368.98	29.6282
50190511b	Mona 9 c	0.00654	2.14067	131.8	3	0.02077	2.50361	132.5	3.28	0.14309	3.50828	135.8	4.46	803.516	131578	4875.09	26.9899
51190511b	Mona 9 c	0.0069	2.31884	138.9	3.16	0.02164	2.49538	138	3.38	0.14583	3.25036	138.2	4.2	739.952	115619	3861.31	29.9429
54190511b	Mona 9 c	0.00681	2.34949	137.2	3.12	0.02114	2.45979	134.9	3.26	0.14021	3.12389	133.2	3.9	998.621	157610	5289.07	29.7993
55190511b	Mona 9 c	0.00678	2.35988	136.5	3.1	0.02172	2.48619	138.5	3.36	0.14831	3.18252	140.4	4.16	890.115	140617	4813.77	29.2115
56190511b	Mona 12 c	0.00722	2.21607	145.4	3.3	0.02222	2.43024	141.6	3.38	0.1465	2.85324	138.8	3.7	1229.7	178009	8954.11	19.8801
57190511b	Mona 12 c	0.00685	2.33577	138	3.12	0.02089	2.39349	133.3	3.18	0.13934	2.87068	132.5	3.56	1176.71	179937	8779.09	20.496
58190511b	Mona 12 c	0.00687	2.32897	138.3	3.12	0.02111	2.36855	134.7	3.22	0.1388	2.91066	132	3.6	1200.16	184632	8868.19	20.8195
59190511b	Mona 12 ir	0.00593	2.36088	119.4	2.7	0.01861	2.47179	118.9	2.9	0.12951	3.38198	123.7	3.94	1056.48	189354	8118.86	23.3228
60190511b	Mona 12 er	0.00684	2.33918	137.8	3.12	0.021	2.38095	134	3.2	0.14089	2.92427	133.8	3.66	1223.55	188956	8819.89	21.4239
61190511b	Mona 12 c	0.00701	2.28245	141.2	3.18	0.02143	2.4265	136.7	3.24	0.14016	2.85388	133.2	3.56	1240.82	185909	9320.88	19.9454
Discordant data
37190511b	Mona 6 er	0.00718	2.22841	144.6	3.34	0.02693	2.59933	171.3	4	0.6109	2.96284	484.1	11	385.753	55611.1	2259.1	24.6165
38190511b	Mona 6 er	0.00601	2.32945	121.2	2.8	0.02017	2.67724	128.7	3	0.16139	4.25057	151.9	6	395.435	71535.7	1915.51	37.3455
41190511b	Mona 7 er	0.00587	2.38501	118.4	2.74	0.02455	2.60692	156.4	4	0.51468	3.20199	421.6	11	152.952	25545	1593.8	16.0277
47190511b	Mona 8 er	0.00545	2.20183	109.8	2.54	0.02116	2.83554	135	4	0.19495	5.32444	180.8	8.82	583.566	114962	2934.05	39.1821
	c : core
	ir : internal rim
	er : external rim

## Sheet: P10-9 zr
		Isotopic ratios		Ages (Ma)		Isotopic ratios		Ages (Ma)		Content
Analysis	sample	206Pb/238U	2σ (%)	206Pb/238U	2σ	207Pb/235U	2σ (%)	207Pb/235U	2σ	Pb(ppm)	Th(ppm)	U(ppm)	Th/U
07200511a	Zr 1 c	0.02332	2.22985	148.6	3.22	0.15978	3.62	150.5	2.59106	19.362	0.803103	869.41	0.000923733
08200511a	Zr 1 r	0.02449	2.20498	156	3.44	0.17154	4.4	160.8	2.96141	9.77311	1.59762	419.886	0.0038049
09200511a	Zr 1 r	0.02448	2.20588	155.9	3.38	0.16494	3.78	155	2.61913	21.2532	0.308079	918.835	0.000335293
10200511a	Zr 2 c	0.02335	2.31263	148.8	3.34	0.15722	4.84	148.3	3.49828	5.54542	0.403459	253.475	0.00159171
11200511a	Zr 2 r	0.02422	2.22956	154.2	3.44	0.16833	4.82	158	3.30304	7.37264	22.8958	328.191	0.0697634
12200511a	Zr 3 c	0.02378	2.18671	151.5	3.26	0.15954	3.52	150.3	2.51974	23.407	29.3309	1065.85	0.0275189
13200511a	Zr 3 er	0.02255	2.21729	143.7	3.1	0.15219	3.5	143.8	2.60201	23.7251	17.7555	1130.44	0.0157068
14200511a	Zr 3 ir	0.02397	2.16938	152.7	3.28	0.16389	3.74	154.1	2.61151	19.2226	8.27936	866.146	0.00955885
17200511a	Zr 5 c	0.02442	2.2932	155.5	3.48	0.16515	5.08	155.2	3.52407	6.0145	15.8328	265.007	0.0597449
18200511a	Zr 5 ir	0.02432	2.22039	154.9	3.44	0.15952	4.78	150.3	3.42277	7.6917	17.8732	329.467	0.0542488
19200511a	Zr 5 er	0.02333	2.22889	148.6	3.22	0.16097	4.06	151.6	2.88252	11.478	10.0059	518.761	0.019288
20200511a	Zr 6 c	0.02351	2.21182	149.8	3.32	0.154	4.8	145.4	3.53247	4.94256	17.8928	219.117	0.0816586
22200511a	Zr 8 c	0.02315	2.15983	147.6	3.16	0.15911	3.76	149.9	2.70253	13.1965	24.4887	602.729	0.0406297
24200511a	Zr 8 ir	0.02341	2.13584	149.2	3.18	0.15954	3.7	150.3	2.65764	14.6774	5.54435	665.046	0.00833679
27200511a	Zr 8 er	0.02222	2.16022	141.7	3.06	0.15124	4.1	143	3.06797	9.76309	65.5967	470.055	0.139551
30200511a	Zr 12 r	0.0224	2.23214	142.8	3.12	0.14952	4.5	141.5	3.39754	6.45002	1.71971	312.509	0.00550293
32200511a	Zr 13 c	0.02639	2.12202	167.9	3.56	0.17765	4.32	166	2.81452	19.2337	9.15288	805.103	0.0113686
33200511a	Zr 13 c	0.0243	2.13992	154.8	3.24	0.1683	3.72	157.9	2.54308	22.6724	2.31661	1023.26	0.00226395
34200511a	Zr 13 r	0.02515	2.14712	160.1	3.44	0.17516	4.78	163.9	3.1514	5.83303	8.90305	252.611	0.035244
31200511a	Zr 13 r	0.02183	2.29043	139.2	3.2	0.14949	5.64	141.5	4.26784	4.50387	3.40678	225.55	0.0151044
37200511a	Zr 14 c	0.02306	2.25499	147	3.24	0.15625	4.98	147.4	3.6224	5.54931	26.6864	261.221	0.102161
40200511a	Zr 16 c	0.02236	2.14669	142.6	2.96	0.15231	3.44	143.9	2.56057	35.6457	53.8498	1634.24	0.0329509
42200511a	Zr 16 ir	0.02288	2.18531	145.8	3.12	0.15219	4.48	143.8	3.33793	5.4626	4.04333	260.874	0.0154992
43200511a	Zr 19 c	0.02267	2.11734	144.5	3.04	0.15182	3.96	143.5	2.96404	15.2176	13.4259	740.119	0.0181402
44200511a	Zr 19 r	0.01839	2.61011	117.5	3.02	0.12261	6.92	117.4	6.24745	6.03123	10.7563	347.926	0.0309154
48200511a	Zr 19 r	0.02195	2.18679	140	3.04	0.14636	4.72	138.7	3.64854	9.17399	13.2963	457.753	0.0290469
50200511a	Zr 22 r	0.02057	2.23627	131.3	2.94	0.13707	5.14	130.4	4.20223	6.0523	19.6205	320.673	0.0611854
51200511a	Zr 23 c	0.02392	2.17391	152.4	3.24	0.15913	4.64	149.9	3.33061	6.68278	5.23559	289.69	0.018073
52200511a	Zr 23 ir	0.02094	2.19675	133.6	2.88	0.13865	4.44	131.8	3.57735	6.04093	3.52788	316.048	0.0111625
68200511a	Zr 30 r	0.0221	2.17195	140.9	2.98	0.14753	4.54	139.7	3.48404	6.51938	4.71333	315.477	0.0149403
77200511a	Zr 40 c	0.03423	2.04499	217	4.32	0.24193	5.18	220	2.62059	47.1099	2.19094	1431.46	0.00153056
78200511a	Zr 40 ir	0.021	2.09524	133.9	2.76	0.14009	4.06	133.1	3.25505	16.4634	1.16193	838.4	0.00138589
79200511a	Zr 46 c	0.02116	2.26843	135	3.06	0.13923	6.02	132.4	4.84091	4.63337	0.705866	227.877	0.00309758
80200511a	Zr 46 r	0.02009	2.38925	128.2	3.04	0.14267	6.72	135.4	5.29894	3.58608	0.767744	186.703	0.00411212
81200511a	Zr 50 c	0.02146	2.14352	136.9	2.88	0.14019	4.62	133.2	3.70925	5.15412	20.357	258.674	0.0786977
83200511a	Zr 51 r	0.01968	2.13415	125.6	2.64	0.12946	4.24	123.6	3.64591	6.57913	6.97417	352.039	0.0198108
88200511a	Zr 57 c	0.02342	2.22032	149.3	3.24	0.15369	5.78	145.2	4.26833	5.79698	7.1798	267.455	0.0268449
89200511a	Zr 57 r	0.02129	2.0667	135.8	2.76	0.13932	3.98	132.4	3.20126	6.78684	10.569	343.061	0.030808
90200511a	Zr 60 c	0.0215	2.04651	137.1	2.78	0.13851	3.9	131.7	3.14779	6.81038	9.46358	342.235	0.0276523
91200511a	Zr 60 r	0.02161	2.12864	137.8	2.84	0.14025	4.38	133.3	3.50802	6.04352	10.7308	299.403	0.0358407
	c : core
	r : rim
	ir : internal rim
	er : external rim

## Sheet: P10-8 + P10-8G zr
		Isotopic ratios		Ages (Ma)		Isotopic ratios		Ages (Ma)		Content
Analysis	sample	206Pb/238U	2σ (%)	206Pb/238U	2σ	207Pb/235U	2σ (%)	207Pb/235U	2σ	Pb(ppm)	U(ppm)	Th(ppm)	Th/U
12160311b	P10-8-04 c	0.05344	2.58234	335.6	8.48	0.39411	3.46096	337.4	9.94	20	424	37	0.0872642
20160311b	P10-8-07 c	0.06676	2.69623	416.6	10.84	0.4914	4.18803	405.9	14.02	13.0874	226.457	49.2323	0.217402
26160311b	P10-8-08 c	0.08934	2.50728	551.6	13.28	0.7199	2.59203	550.6	11.02	103.159	1075.95	557.259	0.517924
27160311b	P10-8-08 c	0.09115	2.50137	562.3	13.5	0.73898	2.53322	561.8	10.94	111.486	1132.82	675.775	0.596544
40160311b	P10-8-11 c	0.33111	2.62753	1843.7	42.16	5.0626	3.06246	1829.9	25.96	18.9022	34.7221	6.85049	0.197295
37060411d	P10-8-14 c	0.07176	2.0903	446.8	9	0.56886	4.19084	457.3	15.44	53.1097	649.783	534.048	0.821886
38060411d	P10-8-14 c	0.07523	1.86096	467.6	8.44	0.60596	2.84837	481	10.92	91.4617	961.086	1233.37	1.2833
47160311b	P10-8-16 c	0.07735	2.66322	480.3	12.36	0.61202	3.88549	484.8	14.98	9.92991	83.9811	11.2719	0.13422
06160311a	P10-8G-01 c	0.09369	2.62568	577.3	14.52	0.75904	3.05122	573.5	13.36	27.2782	229.568	307.619	1.33999
09160311a	P10-8G-02 c	0.09013	2.59625	556.3	13.88	0.73571	2.79458	559.9	12.04	60.7105	722.665	178.679	0.24725
41160311a	P10-8G-09 c	0.10065	2.90114	618.2	17.14	0.86759	4.841	634.3	22.84	5.6572	49.0666	52.7756	1.07559
17060411a	P10-8G-15 c	0.06466	2.59821	403.9	10.12	0.48784	6.65792	403.4	22.18	3.84593	50.9219	44.161	0.867231
20060411a	P10-8G-15 c	0.05608	2.21113	351.8	7.58	0.41386	4.70207	351.7	13.98	5.94174	98.9621	30.2131	0.3053
21060411a	P10-8G-15 c	0.05306	4.25933	333.3	13.84	0.42205	13.2212	357.5	39.84	1.47036	24.3019	18.0257	0.741741
29060411a	P10-8G-17 c	0.08449	2.55652	522.8	12.88	0.68675	5.76338	530.8	23.82	8.96942	96.4968	59.1161	0.612623
30060411a	P10-8G-17 c	0.09179	2.13531	566.1	11.56	0.74373	3.31303	564.6	14.36	25.1994	257.098	130.029	0.505755
32060411a	P10-8G-19 c	0.04846	2.1461	305.1	6.42	0.34468	3.29581	300.7	8.58	70	1157	114	0.0985307
40060411a	P10-8G-22 c	0.06414	2.65045	400.7	10.32	0.48179	5.67052	399.3	18.72	12.5067	226.086	8.05241	0.0356166
09060411b	P10-8G-24 c	0.04967	2.09382	312.5	6.36	0.37194	3.48443	321.1	9.6	26.0574	560.96	71.8714	0.128122
12060411b	P10-8G-25 c	0.09109	2.04194	562	11	0.7631	3.15817	575.8	13.88	16	152	120	0.789474
20060411b	P10-8G-27 c	0.11133	2.13779	680.5	13.82	1.0065	3.8152	707.1	19.44	6.04617	52.1378	28.5236	0.547081
18060411b	P10-8G-27 c	0.11835	1.99409	721.1	13.58	1.04351	2.90175	725.7	15.04	26	153	194	1.26797
29060411b	P10-8G-28 c	0.15851	3.9619	948.5	34.98	1.54738	10.6839	949.4	65.9	14.2609	51.4921	19.692	0.382428
31060411b	P10-8G-29 c	0.25452	1.90162	1461.7	24.84	3.20954	2.56922	1459.5	19.9	106.251	421.386	92.2348	0.218884
38060411b	P10-8G-30 c	0.11037	2.02954	674.9	13.02	0.93835	3.56797	672	17.54	8.34809	71.2441	36.1629	0.507592
05060411c	P10-8G-32 c	0.07374	2.00705	458.7	8.86	0.60084	3.66154	477.8	13.94	7.60907	99.7136	38.6272	0.387381
12060411c	P10-8G-34 c	0.08912	1.81777	550.3	9.64	0.731	2.487	557.1	10.66	28.9986	313.564	145.606	0.464357
07060411d	P10-8G-34 c	0.09708	1.81294	597.2	10.34	0.78827	2.34945	590.2	10.52	34.0076	334.795	168.333	0.502794
08060411d	P10-8G-34 c	0.08544	1.77903	528.5	9.04	0.68522	2.07816	529.9	8.58	66.7873	758.731	316.977	0.417773
35060411c	P10-8G-43 c	0.04859	1.97572	305.9	5.92	0.3578	3.73952	310.6	10	14.3803	288.316	112.766	0.39112
		Isotopic ratios		Ages (Ma)		Isotopic ratios		Ages (Ma)		Content
Analysis	sample	206Pb/238U	2σ (%)	206Pb/238U	2σ	207Pb/235U	2σ (%)	207Pb/235U	2σ	Pb(ppm)	U(ppm)	Th(ppm)	Th/U
06160311b	P10-8-02 ir	0.04442	2.56641	280.1	7.08	0.31789	3.46032	280.3	8.48	7.66596	145.81	144.691	0.992325
07160311b	P10-8-02 ir	0.03805	2.523	240.7	5.98	0.26589	2.9185	239.4	6.22	46.7688	1347.29	32.421	0.0240639
15160311b	P10-8-05 ir	0.04445	2.56468	280.3	7.04	0.32331	3.21054	284.4	7.96	11.8372	236.124	153.75	0.651141
05160311b	P10-8-05 ir	0.03882	2.88511	245.5	6.94	0.27837	5.61842	249.4	12.42	5.16757	122.546	77.3296	0.631024
36060411d	P10-8-08 ir	0.04599	1.783	289.9	5.04	0.32946	2.16718	289.2	5.44	80.5576	1838.95	306.534	0.16669
35160311b	P10-8-10 ir	0.04595	2.52448	289.6	7.2	0.33338	2.8916	292.1	7.34	23.7795	335.963	12.2626	0.0364999
36160311b	P10-8-10 ir	0.04403	2.54372	277.8	6.92	0.31081	2.9407	274.8	7.08	12.922	192.744	4.6866	0.0243152
45160311b	P10-8-12 ir	0.0471	2.67516	296.7	7.74	0.33893	3.98312	296.4	10.24	22.0198	319.435	11.7231	0.0366994
46160311b	P10-8-13 ir	0.04262	2.58095	269.1	6.78	0.30656	3.125	271.5	7.44	31.3962	478.105	55.4805	0.116042
48160311b	P10-8-13 ir	0.04518	2.56751	284.9	7.14	0.32494	3.04056	285.7	7.56	23.2547	358.056	11.0888	0.0309695
41060411d	P10-8-15 ir	0.0451	1.95122	284.4	5.44	0.32296	3.58558	284.2	8.9	13.5243	290.845	128.543	0.441964
07160311a	P10-8G-01 ir	0.04333	2.67713	273.5	7.12	0.31222	3.39504	275.9	8.2	13.9479	342.919	26.3053	0.0767099
10160311a	P10-8G-02 ir	0.04343	2.62491	274.1	7.04	0.30958	3.02991	273.9	7.28	21.0283	496.461	81.1199	0.163396
15160311a	P10-8G-03 ir	0.04879	2.62349	307.1	7.86	0.35755	2.97581	310.4	7.96	21.5751	490.831	48.9604	0.0997499
16160311a	P10-8G-03 ir	0.04655	2.6638	293.3	7.58	0.3393	3.17713	296.6	8.18	12.8691	249.426	169.385	0.679098
17160311a	P10-8G-03 ir	0.04272	2.71536	269.7	7.14	0.31191	3.67414	275.7	8.88	3.53244	236.558	9.31545	0.0393792
18160311a	P10-8G-03 ir	0.04521	2.83123	285.1	7.84	0.32237	4.61581	283.7	11.42	3.16729	69.0262	25.2634	0.365997
21160311a	P10-8G-04 ir	0.04424	2.62206	279	7.14	0.31603	2.82252	278.8	6.88	30.857	732.701	106.795	0.145755
20160311a	P10-8G-04 ir	0.03956	2.73003	250.1	6.66	0.28106	3.86394	251.5	8.6	14.1928	371.635	59.4951	0.16009
29160311a	P10-8G-06 ir	0.04465	2.68757	281.6	7.36	0.32765	3.41828	287.8	8.56	13	293	48	0.163823
31160311a	P10-8G-07 ir	0.04456	2.60323	281	7.18	0.31992	2.73818	281.8	6.74	56.0642	1310.36	212.734	0.162348
46160311a	P10-8G-10 ir	0.04264	2.90807	269.2	7.6	0.31692	4.97917	279.5	12.18	3.08291	61.5203	50.8629	0.826766
45160311a	P10-8G-10 ir	0.03829	2.76835	242.3	6.52	0.26963	4.01291	242.4	8.64	18.2332	498.846	50.3555	0.100944
08160311c	P10-8G-12 ir	0.04702	2.59464	296.2	7.52	0.34469	2.83733	300.7	7.38	44.2018	1012.16	76.2731	0.0753565
51160311a	P10-8G-12 ir	0.0443	2.61851	279.4	7.2	0.32034	2.85322	282.2	7.04	43.4615	1097.76	8.46303	0.00770933
52160311a	P10-8G-12 ir	0.04641	2.62874	292.4	7.56	0.33664	2.97647	294.6	7.6	22.169	516.582	47.8695	0.0926658
09160311c	P10-8G-13 ir	0.04681	2.60628	294.9	7.52	0.3341	3.03502	292.7	7.72	25.0779	582.064	24.1984	0.0415735
06060411a	P10-8G-13 ir	0.04352	2.06801	274.6	5.56	0.30952	4.71052	273.8	11.3	7.47823	148.93	22.3958	0.150378
07060411a	P10-8G-13 ir	0.04369	1.83108	275.7	4.88	0.32256	3.03819	283.9	7.52	20.0863	407.759	55.8678	0.137012
10060411a	P10-8G-14 ir	0.03935	1.82973	248.8	4.5	0.2814	3.05615	251.8	6.8	18	479	26	0.0542797
15060411a	P10-8G-15 ir	0.04736	2.28041	298.3	6.62	0.34237	5.33925	299	13.82	4.18652	89.345	25.942	0.290358
22060411a	P10-8G-15 ir	0.04125	2.47273	260.6	6.38	0.29266	6.15048	260.7	14.14	9	231	18	0.0779221
25060411a	P10-8G-16 ir	0.04554	2.10804	287.1	5.92	0.32683	3.70223	287.1	9.26	20.5642	493.601	33.0954	0.0670488
26060411a	P10-8G-16 ir	0.04747	2.10659	299	6.18	0.34665	3.66364	302.2	9.56	20.483	478.398	12.9811	0.0271345
28060411a	P10-8G-16 ir	0.04866	2.30169	306.3	6.88	0.34754	4.69011	302.9	12.28	14.083	328.744	5.07082	0.0154248
16160311c	P10-8G-18 ir	0.04289	3.21753	270.7	8.54	0.31198	7.19277	275.7	17.36	5.24438	122.161	3.03853	0.0248732
05060411b	P10-8G-19 ir	0.04268	2.29616	269.5	6.12	0.31513	4.90591	278.1	11.94	10.4669	248.781	34.2825	0.137802
35060411a	P10-8G-19 ir	0.04528	2.4735	285.5	6.92	0.32989	5.14717	289.5	12.96	11.7441	272.733	70.8877	0.259916
37060411a	P10-8G-20 ir	0.04348	2.4379	274.3	6.5	0.33023	4.54835	289.7	11.46	19.3476	379.038	444.63	1.17305
38060411a	P10-8G-22 ir	0.04333	2.4925	273.5	6.72	0.32428	5.04502	285.2	12.54	14.5037	371.837	49.2285	0.132393
39060411a	P10-8G-22 ir	0.04636	2.41588	292.1	6.94	0.33483	4.47989	293.2	11.4	22.9292	548.611	98.3504	0.179272
07060411b	P10-8G-24 ir	0.0459	2.00436	289.3	5.7	0.33592	2.92332	294.1	7.46	27.9041	598.541	159.535	0.266539
08060411b	P10-8G-24 ir	0.04323	2.08189	272.8	5.52	0.31704	3.31819	279.6	8.12	23.2685	561.398	5.92585	0.0105555
21160311c	P10-8G-24 ir	0.04601	3.17322	290	8.98	0.32311	7.04404	284.3	17.46	3	54	21	0.388889
15060411b	P10-8G-25 ir	0.04744	2.06577	298.8	6.06	0.34517	3.59243	301.1	9.36	24.6767	520.833	171.09	0.328494
16060411b	P10-8G-26 ir	0.04651	2.23608	293	6.34	0.33564	4.5227	293.9	11.54	11.5042	258.421	26.75	0.103513
17060411b	P10-8G-26 ir	0.04476	2.01072	282.3	5.52	0.3147	3.06323	277.8	7.44	21.1717	480.884	122.145	0.254
19060411b	P10-8G-27 ir	0.04621	1.94763	291.2	5.56	0.33119	2.74163	290.5	6.92	27.5848	634.756	117.792	0.185571
21060411b	P10-8G-28 ir	0.04279	2.00982	270.1	5.28	0.31133	3.17348	275.2	7.66	26.6292	594.706	352.244	0.592299
32060411b	P10-8G-29 ir	0.04785	2.21526	301.3	6.54	0.34927	4.79858	304.2	12.62	5.51064	104.371	72.7168	0.696717
39060411b	P10-8G-30 ir	0.04748	2.31676	299	6.8	0.32812	5.54066	288.1	13.9	19.3663	431.739	38.9442	0.0902031
43060411b	P10-8G-32 ir	0.0465	1.89247	293	5.48	0.32797	3.01857	288	7.58	29.8057	662.137	165.894	0.250543
09060411c	P10-8G-33 ir	0.04316	1.89991	272.4	5.06	0.30884	3.12136	273.3	7.48	12.944	313.643	54.2429	0.172945
08060411c	P10-8G-34 ir	0.04732	2.36686	298.1	6.94	0.3391	5.97464	296.5	15.36	6.16539	104.323	127.291	1.22016
18060411c	P10-8G-35 ir	0.04661	2.61746	293.7	7.46	0.34219	6.90844	298.8	17.88	1.36888	24.3186	27.9889	1.15093
20060411c	P10-8G-36 ir	0.04328	3.0037	273.1	7.98	0.34038	8.33774	297.5	21.5	2.1989	48.7818	21.1517	0.433598
25060411c	P10-8G-38 ir	0.04228	1.98675	267	5.16	0.31426	3.66575	277.5	8.9	28.9546	714.868	111.374	0.155796
29060411c	P10-8G-42 ir	0.04279	2.24351	270.1	5.96	0.32301	5.22584	284.2	12.94	8.56466	201.4	63.5434	0.315509
32060411c	P10-8G-43 ir	0.0443	1.85102	279.4	5.08	0.32213	2.84978	283.5	7.04	25.6659	562.744	238.311	0.42348
39060411c	P10-8G-45 ir	0.04698	1.95828	296	5.66	0.3383	3.61809	295.9	9.28	17.654	393.071	60.7169	0.154468
41060411c	P10-8G-46 ir	0.04349	1.88549	274.4	5.04	0.32154	3.02917	283.1	7.48	29.7066	745.5	7.48312	0.0100377
28160311c	P10-8G-48 ir	0.04506	2.7075	284.1	7.5	0.32527	4.02742	285.9	10.04	22.5481	549.223	27.9218	0.0508387
29160311c	P10-8G-48 ir	0.04507	2.61815	284.2	7.32	0.33214	3.48648	291.2	8.82	13.1232	304.88	20.5595	0.0674347
09060411d	P10-8G-50 ir	0.04196	2.04957	265	5.34	0.30421	4.14845	269.7	9.82	25.0549	635.517	60.0291	0.0944571
22060411d	P10-8G-58 ir	0.03996	1.85185	252.6	4.54	0.29042	2.61001	258.9	5.96	33.3192	452.88	0.739065	0.00163192
26060411d	P10-8G-59 ir	0.03854	1.92008	243.8	4.62	0.27463	3.40094	246.4	7.44	22.9266	319.945	2.71277	0.00847887
25060411d	P10-8G-59 ir	0.04556	1.84372	287.2	5.24	0.33184	2.87488	291	7.28	11.8963	128.055	10.6872	0.0834581
27060411d	P10-8G-59 ir	0.0423	1.89125	267.1	4.98	0.30065	3.22634	266.9	7.58	16.7117	188.281	20.0702	0.106597
3160411d	P10-8G-60 ir	0.04529	1.85471	285.5	5.12	0.31934	2.67427	281.4	6.58	47.8842	1122.36	126.111	0.112362
3460411d	P10-8G-61 ir	0.0443	2.0316	279.4	5.56	0.33073	3.99117	290.1	10.06	21.8587	504.639	108.815	0.215628
		Isotopic ratios		Ages (Ma)		Isotopic ratios		Ages (Ma)		Content
Analysis	sample	206Pb/238U	2σ (%)	206Pb/238U	2σ	207Pb/235U	2σ (%)	207Pb/235U	2σ	Pb(ppm)	U(ppm)	Th(ppm)	Th/U
Data used to calculate the Cenozoic age
18160311b	P10-8-06 er	0.00657	5.78387	42.2	2.4	0.04361	20.4999	43.3	8.7	0.241426	37.6877	0.120605	0.00320011
19060411a	P10-8G-15 er	0.0064	2.5	41.1	1	0.04773	5.90823	47.3	2.72	16.1885	2617.69	12.4384	0.00475168
40060411b	P10-8G-32 er	0.00681	8.51689	43.7	3.76	0.12903	18.4453	123.2	21.4	1.15164	149.549	0.745553	0.00498535
10160311c	P10-8G-14 er	0.00693	14.1414	44.5	6.22	0.27522	20.6962	246.9	45.36	0.213281	14.6949	0.255678	0.0173991
15160311c	P10-8G-14 er	0.00731	8.48153	47	3.92	0.26301	12.7524	237.1	26.96	1.70547	128.171	2.56256	0.0199933
12060411d	P10-8G-56 er	0.00673	9.50966	43.3	4.1	0.12452	20.7356	119.2	23.32	0.661887	76.5881	3.75888	0.0490792
09260511b	P10-8m-26	0.00664	2.40964	42.7	0.98	0.05965	3.28583	58.8	1.88	25.254	3983.03	19.9483	0.00500832
18260511b	P10-8m-30	0.00852	2.34742	54.7	1.24	0.46769	2.38192	389.6	7.7	73.8133	4246.6	122.444	0.0288335
23260511b	P10-8m-32	0.00708	2.54237	45.5	1.18	0.25148	3.18117	227.8	6.5	40.949	3663.19	88.7235	0.0242203
40260511b	P10-8m-40	0.00656	2.43902	42.2	1	0.09099	3.67073	88.4	3.1	18.2477	2591.9	78.5858	0.0303198
49260511b	P10-8m-43	0.00725	2.2069	46.6	0.98	0.09276	2.56576	90.1	2.2	24.8947	3230.53	126.946	0.0392959
42060411d	P10-8m-01	0.00647	1.85471	41.6	0.82	0.08391	3.05089	81.8	2.38	35.8873	5223.4	131.3	0.0251369
46060411d	P10-8m-02	0.00741	2.15924	47.6	1.02	0.14518	3.37512	137.7	4.36	30.481	3388.08	21.2586	0.00627453
47060411d	P10-8m-02	0.00699	2.28898	44.9	1	0.05365	5.0699	53.1	2.62	17.3633	2663.7	31.2969	0.0117494
48060411d	P10-8m-03	0.00716	1.95531	46	0.9	0.138	2.81159	131.3	3.46	37.023	4303.35	300.208	0.0697616
20260511a	P10-8m-12	0.00795	2.26415	51	1.12	0.31892	2.30152	281.1	5.66	63.7107	4735.56	87.6646	0.018512
Data not used to calculate the Cenozoic age
05260511a	P10-8m-04	0.00511	2.34834	32.8	0.76	0.04112	3.21012	40.9	1.3	27.5076	5730.52	85.8162	0.0149753
07260511a	P10-8m-04	0.00594	2.3569	38.2	0.86	0.16617	2.45532	156.1	3.56	55.0213	6548.84	144.799	0.0221107
08260511a	P10-8m-05	0.00542	2.21402	34.9	0.82	0.04465	3.71781	44.4	1.6	13.3954	2595.71	66.2683	0.02553
10260511a	P10-8m-07	0.00508	2.3622	32.7	0.74	0.03574	2.9099	35.7	1.02	26.5146	5713.22	98.3184	0.0172089
17260511a	P10-8m-10	0.00516	2.32558	33.2	0.74	0.03707	2.75155	37	1	26.8696	5612.81	99.3416	0.0176991
21260511a	P10-8m-13	0.00448	2.23214	28.8	0.66	0.04811	3.24257	47.7	1.5	22.6784	5002.56	19.582	0.00391438
22260511a	P10-8m-13	0.00464	2.15517	29.8	0.7	0.07525	3.08306	73.7	2.2	16.3313	3116.01	16.259	0.00521788
27260511a	P10-8m-14	0.00566	2.12014	36.4	0.8	0.04211	2.89717	41.9	1.2	16.3106	3111.68	70.0733	0.0225195
28260511a	P10-8m-14	0.00558	2.15054	35.9	0.8	0.04858	3.08769	48.2	1.46	17.3546	3222.49	69.6201	0.0216045
30260511a	P10-8m-15	0.0062	2.25806	39.8	0.9	0.09507	2.75586	92.2	2.44	32.3352	4655.93	285.67	0.0613563
31260511a	P10-8m-16	0.00444	2.25225	28.6	0.64	0.03244	3.51418	32.4	1.12	30.9179	7512.51	229.359	0.0305303
32260511a	P10-8m-17	0.00491	2.44399	31.6	0.74	0.08898	3.14677	86.5	2.62	26.8716	4625.45	65.3923	0.0141375
33260511a	P10-8m-17	0.00535	2.61682	34.4	0.84	0.07356	3.83361	72.1	2.68	11.5953	2010.26	19.3715	0.00963632
38260511a	P10-8m-20	0.0039	2.05128	25.1	0.56	0.03427	3.09308	34.2	1.04	30.0511	7982.25	264.542	0.0331412
05260511b	P10-8m-23	0.00503	2.38569	32.3	0.8	0.05533	3.94	54.7	2.1	10.6189	2085.65	10.353	0.00496392
06260511b	P10-8m-24	0.00497	2.41449	32	0.76	0.11394	2.91381	109.6	3.02	30.5099	4694.88	71.4257	0.0152135
07260511b	P10-8m-24	0.00608	2.30263	39.1	0.92	0.16343	2.65557	153.7	3.78	60.6588	7141.56	107.64	0.0150724
10260511b	P10-8m-27	0.00602	2.32558	38.7	0.88	0.05052	2.96912	50	1.44	31.7422	5570.99	146.283	0.0262581
12260511b	P10-8m-28	0.00503	2.38569	32.4	0.78	0.07283	3.43265	71.4	2.38	23.7087	4309.56	162.098	0.0376136
13260511b	P10-8m-28	0.00555	2.16216	35.7	0.82	0.07486	2.88539	73.3	2.04	38.5128	6448.16	140.421	0.0217769
19260511b	P10-8m-31	0.00544	2.20588	35	0.78	0.09181	2.52696	89.2	2.16	68.9628	10817	1219.35	0.112725
20260511b	P10-8m-31	0.00538	2.23048	34.6	0.74	0.06617	2.38779	65.1	1.5	108.733	19433.9	1100.65	0.0566354
21260511b	P10-8m-32	0.00583	2.05832	37.4	0.8	0.04547	2.46316	45.1	1.1	21.6027	3970.45	94.4672	0.0237925
22260511b	P10-8m-32	0.00584	2.39726	37.5	0.88	0.09474	3.18767	91.9	2.8	24.3216	3675.1	89.704	0.0244086
26260511b	P10-8m-33	0.00501	2.39521	32.2	0.8	0.04545	4.44444	45.1	1.98	10.5575	2176.96	78.3877	0.0360078
28260511b	P10-8m-34	0.00505	2.37624	32.5	0.78	0.07629	3.59156	74.6	2.58	20.0379	3568.64	92.7968	0.0260034
29260511b	P10-8m-34	0.00598	2.34114	38.4	0.88	0.06954	3.24993	68.3	2.16	23.3149	3780.64	93.9065	0.0248388
27260511b	P10-8m-34	0.00621	2.25443	39.9	0.88	0.07858	2.82515	76.8	2.1	26.9659	4101.75	112.369	0.0273953
30260511b	P10-8m-35	0.00458	2.62009	29.4	0.7	0.03248	4.6798	32.5	1.5	13.0815	3102.32	108.843	0.0350843
31260511b	P10-8m-36	0.00526	2.28137	33.8	0.74	0.03945	3.09252	39.3	1.18	23.5472	4826.77	107.864	0.022347
32260511b	P10-8m-36	0.00606	2.31023	39	0.92	0.21522	2.76926	197.9	4.98	38.36	4013.65	107.66	0.0268234
33260511b	P10-8m-37	0.00468	2.5641	30.1	0.74	0.03493	5.03865	34.9	1.72	11.8091	2723.83	82.9309	0.0304464
36260511b	P10-8m-37	0.00596	2.34899	38.3	0.92	0.04883	4.58734	48.4	2.18	11.0269	1946.39	51.6861	0.0265549
41260511b	P10-8m-40	0.00567	2.1164	36.5	0.8	0.04454	3.45757	44.2	1.5	6.71004	1267.91	29.8872	0.023572
42260511b	P10-8m-40	0.00452	2.65487	29.1	0.82	0.03548	6.708	35.4	2.34	8.62921	2042.58	53.3065	0.0260976
43260511b	P10-8m-40	0.00609	2.29885	39.1	0.84	0.04437	3.11021	44.1	1.34	12.6116	2233.98	66.9828	0.0299835
47260511b	P10-8m-42	0.00636	2.20126	40.9	0.88	0.13587	2.45823	129.4	3	28.4003	3524.81	77.5518	0.0220017
50260511b	P10-8m-43	0.00544	2.20588	34.9	0.8	0.05877	3.77744	58	2.14	19.7952	3646.65	150.966	0.0413985
	c : core
	ir : internal rim
	er : external rim
	P10-8m : metamict zircon

## Sheet: P04-46 zr
		Isotopic ratios		Ages (Ma)		Isotopic ratios		Ages (Ma)		Content
Analysis	sample	206Pb/238U	2σ (%)	206Pb/238U	2σ	207Pb/235U	2σ (%)	207Pb/235U	2σ	Pb(ppm)	U(ppm)	Th(ppm)	Th/U
41050210c	P04-46-02 r	0.02388	2.26131	148.3	4.9	0.15729	4.2215	152.1	5.84	2.90112	41.3962	144.947	0.285594
42050210c	P04-46-02 c	0.02342	2.13493	145.6	4.96	0.15414	3.29571	149.2	4.48	7.18408	47.6233	386.178	0.123319
43050210c	P04-46-03 c	0.02118	2.17186	137.5	7.52	0.14503	3.32345	135.1	4.28	6.44404	16.9821	390.546	0.043483
47050210c	P04-46-06 r	0.02157	2.13259	138.1	3.78	0.14567	2.96561	137.6	3.82	10.9322	67.6076	643.852	0.105005
48050210c	P04-46-06 c	0.02383	2.18212	149.1	8.24	0.15819	3.57798	151.8	4.96	5.0034	16.4945	266.039	0.0620006
49050210c	P04-46-08 r	0.02147	2.14252	137.3	4.08	0.1448	3.19061	137	4.1	8.42944	67.8506	490.196	0.138415
50050210c	P04-46-09 c	0.02141	2.05511	135.3	2.34	0.14253	2.60998	136.5	3.3	62.5254	832.871	3604.47	0.231066
51050210c	P04-46-10 c	0.02285	2.18818	140.9	5.42	0.14889	3.6537	145.6	4.8	5.24839	32.7453	289.777	0.113002
52050210c	P04-46-12 r	0.02061	2.03785	131.3	3.5	0.13803	3.02833	131.5	3.74	8.32573	67.6459	508.507	0.133028
54050210c	P04-46-13 c	0.02235	2.05817	141.4	4.06	0.14948	2.98368	142.5	3.94	10.2939	57.8428	583.736	0.0990907
De14b16	P04-46-1P c	0.02288	2.18531	143.4	3.68	0.1517	2.75544	145.8	3.14	12.6905	114.22	675.635	0.169057
De13b28	P04-46-1P r	0.02277	1.93237	148	3.28	0.15692	2.38338	145.1	2.76	4.32823	5.23869	236.497	0.0221512
De14b19	P04-46-2P c	0.02372	1.93929	150.8	2.98	0.16015	2.12301	151.1	2.94	10.8668	66.2997	582.809	0.113759
De13b31	P04-46-4P r	0.02201	1.90822	138.7	2.68	0.14641	2.0627	140.4	2.66	11.6918	17.9725	651.241	0.0275973
De14b21	P04-46-5P c	0.02329	1.9751	149	2.96	0.15803	2.12618	148.4	2.9	10.5575	32.165	589.156	0.0545951
De13b35	P04-46-5P r	0.02178	1.92837	140	3.4	0.14784	2.5974	138.9	2.68	3.18251	5.59112	177.616	0.0314787
De14b22	P04-46-6P c	0.02202	1.99818	140.9	2.82	0.1489	2.14909	140.4	2.74	8.70829	26.2715	494.211	0.0531584
De13b36	P04-46-6P r	0.02259	1.94776	144.5	2.8	0.15299	2.07857	144	2.74	10.5389	6.73205	597.278	0.0112712
De14b23	P04-46-7P c	0.0212	1.98113	135.8	2.74	0.14305	2.15309	135.2	2.64	7.2879	85.2089	408.236	0.208725
De14b24	P04-46-8P c	0.02146	1.95713	137.2	2.68	0.14471	2.08693	136.9	2.66	11.0771	90.6425	624.169	0.145221
De14b25	P04-46-9P c	0.02171	1.93459	137.9	2.9	0.14546	2.24117	138.4	2.7	9.37154	154.018	534.97	0.287901
De13b39	P04-46-9P r	0.02184	1.92308	140.5	2.88	0.14844	2.1827	139.3	2.66	7.47047	13.7344	416.493	0.0329762
	c : core
	r : rim

## Sheet: P04-47 + P05-01 zr
		Isotopic ratios		Ages (Ma)		Isotopic ratios		Ages (Ma)		Content
Analysis	sample	206Pb/238U	2s %	206Pb/238U	2s	207Pb/235U	2s %	207Pb/235U	2s	Pb ppm	Th ppm	U ppm	Th/U
23230210a	P04-47-z11	0.01883	2.12427	120.3	2.48	0.1315	3.45247	125.4	4.06	34.0241	39.1822	2354.11	0.0166442
26230210a	P04-47-z13	0.02167	2.12275	138.2	2.92	0.15174	4.12548	143.4	5.52	13.7431	17.6477	817.708	0.0215818
29230210a	P04-47-z14	0.01783	2.35558	114	2.7	0.12889	6.47063	123.1	7.5	7.862	18.3657	565.143	0.0324974
44230210a	P04-47-z26	0.02052	2.53411	130.9	3.26	0.13303	8.53943	126.8	10.18	2.31923	11.0299	142.311	0.0775056
46230210a	P04-47-z27	0.01791	2.34506	114.4	2.6	0.1228	6.2215	117.6	6.92	9.12416	21.4078	658.881	0.0324912
47230210a	P04-47-z29	0.01862	2.14823	118.9	2.54	0.13266	4.97512	126.5	5.92	7.94788	19.075	545.772	0.0349505
07230210b	P04-47-z33	0.03036	1.97628	192.8	3.78	0.21244	3.36095	195.6	5.98	20.1621	189.218	810.274	0.233523
08230210b	P04-47-z34A	0.04197	2.04908	265	5.3	0.31426	3.97123	277.5	9.64	21.7673	37.7169	667.221	0.0565283
10230210b	P04-47-z34C	0.02083	2.59241	132.9	3.36	0.1427	8.4513	135.4	10.72	5.13109	46.8749	296.505	0.158092
13230210b	P04-47-z36A	0.02006	2.29312	128	2.96	0.14182	6.71273	134.7	8.48	8.08569	24.1359	521.342	0.0462956
18230210b	P04-47-z36D	0.02216	2.34657	141.3	3.26	0.15896	6.75642	149.8	9.42	4.69564	12.9199	271.53	0.0475818
24230210b	P04-47-z37A	0.02496	2.00321	158.9	3.2	0.17401	3.86185	162.9	5.8	20.6625	500.377	864.631	0.578718
09240210a	P05-01-z1A2	0.02116	2.26843	135	3.1	0.14322	3.86817	135.9	4.92	9.64387	34.4408	585.73	0.0587999
10240210a	P05-01-z1B1	0.02159	2.31589	137.7	3.12	0.15146	3.63132	143.2	4.84	10.3424	16.0973	618.145	0.0260414
27240210a	P05-01-z2A	0.02163	2.40407	138	3.24	0.15315	4.79269	144.7	6.46	7.95757	18.5807	475.427	0.039082
28240210a	P05-01-z2A	0.02323	2.49677	148.1	3.64	0.17063	5.87236	160	8.68	6.66684	15.3244	368.421	0.0415947
29240210a	P05-01-z2B1	0.02253	2.30803	143.6	3.32	0.15679	4.36252	147.9	6	8.15075	11.2336	469.384	0.0239327
31240210a	P05-01-z2B3	0.01946	2.36382	124.3	2.9	0.13158	4.74236	125.5	5.6	8.21897	23.371	546.878	0.0427354
42240210a	P05-01-z5A3	0.01951	2.46028	124.5	2.98	0.13596	5.41336	129.4	6.58	7.44585	12.6522	493.395	0.0256431
20240210b	P05-01-z5E2	0.02063	2.03587	131.7	2.66	0.14422	4.31286	136.8	5.52	9.41363	27.723	588.1	0.0471399
24240210b	P05-01-z6A	0.01907	2.09754	121.8	2.58	0.13471	5.1815	128.3	6.24	7.34394	17.0519	497.571	0.0342703
27240210b	P05-01-z6B	0.01881	2.12653	120.1	2.54	0.12709	5.25612	121.5	6.02	8.08495	22.5221	551.488	0.0408388
28240210b	P05-01-z6C	0.01906	2.09864	121.7	2.5	0.13051	4.71994	124.6	5.54	7.89614	21.9796	535.228	0.0410659
32240210b	P05-01-z7B2	0.02025	2.07407	129.3	2.64	0.14335	4.43669	136	5.66	7.86327	17.4566	499.654	0.0349375
33240210b	P05-01-z7B3	0.02315	1.98704	147.6	2.94	0.16349	3.87791	153.8	5.54	8.97008	25.2048	492.606	0.0511661
39240210b	P05-01-z7A3	0.02155	2.22738	137.4	2.98	0.15187	6.20267	143.6	8.3	6.25268	17.1759	370.283	0.0463859
44240210b	P05-01-z9	0.01963	2.34335	125.3	2.94	0.1421	7.31879	134.9	9.26	2.69084	10.7827	176.298	0.0611618
Discordant data
13230210a	P04-47-z6	0.02026	2.27048	129.3	2.88	0.18085	4.65579	168.8	7.24	13.6805	34.4778	838.347	0.041126
14230210a	P04-47-z7	0.01994	2.20662	127.3	2.8	0.15531	4.59726	146.6	6.26	13.8792	44.7654	885.081	0.0505778
17230210a	P04-47-z8A	0.02137	2.15255	136.3	2.96	0.1618	4.43758	152.3	6.28	10.2548	33.4622	595.819	0.0561616
18230210a	P04-47-z8B	0.0214	2.33645	136.5	3.12	0.23178	4.97023	211.7	9.48	9.57111	34.8849	520.543	0.0670164
19230210a	P04-47-z9A	0.02497	2.40288	159	3.82	0.45603	5.08738	381.5	16.18	10.661	30.1808	424.458	0.0711044
20230210a	P04-47-z9B	0.02192	2.55474	139.8	3.56	0.18664	7.36177	173.8	11.76	6.55573	19.673	365.536	0.0538197
24230210a	P04-47-z12	0.02271	2.28974	144.7	3.28	0.23265	5.10638	212.4	9.8	13.1354	78.023	676.44	0.115344
27230210a	P04-47-z13	0.01984	2.82258	126.6	3.54	0.2682	7.52424	241.3	16.16	4.96564	13.5443	273.194	0.0495776
30230210a	P04-47-z15	0.02117	2.36183	135	3.1	0.22762	5.28073	208.2	9.94	12.4232	32.9052	704.461	0.0467097
33230210a	P04-47-z16	0.01958	2.14505	125	2.66	0.17137	4.36482	160.6	6.48	13.7986	28.8154	876.346	0.0328813
35230210a	P04-47-z19A	0.0199	2.21106	127	2.76	0.17576	4.74511	164.4	7.2	11.7382	19.2611	733.633	0.0262544
36230210a	P04-47-z19B	0.019	2.10526	121.3	2.5	0.15752	3.73286	148.5	5.16	21.1367	27.5412	1403.6	0.0196218
37230210a	P04-47-z19C	0.02232	2.95699	142.3	4.16	0.50926	7.16334	418	24.54	4.06974	3.93445	166.857	0.0235798
38230210a	P04-47-z19D	0.01986	2.1148	126.8	2.72	0.17453	4.58374	163.3	6.92	10.1657	27.1997	636.548	0.04273
39230210a	P04-47-z22	0.01897	2.31945	121.1	2.74	0.14277	5.75751	135.5	7.3	10.2083	22.5378	690.606	0.0326348
40230210a	P04-47-z24	0.02158	2.03892	137.6	2.8	0.1971	3.59209	182.7	6	37.7391	34.8471	2170.78	0.0160528
50230210a	P04-47-z32A	0.0186	2.15054	118.8	2.52	0.13727	4.93917	130.6	6.06	11.8756	26.1848	821.435	0.0318769
12230210b	P04-47-z36A	0.01977	2.52908	126.2	3.14	0.1578	8.04816	148.8	11.14	2.2572	17.1381	131.244	0.130582
14230210b	P04-47-z36B	0.02024	3.35968	129.2	4.3	0.20242	11.6095	187.2	19.84	2.15236	11.0475	122.524	0.0901662
19230210b	P04-47-z38	0.02022	2.37389	129	3.1	0.3076	5.6632	272.3	13.52	7.40818	17.4253	384.326	0.0453399
23230210b	P04-47-z31	0.02923	2.18953	185.7	4.06	0.22105	5.67292	202.8	10.42	14.3001	270.556	546.94	0.494672
25230210b	P04-47-z37B	0.02945	2.10526	187.1	3.84	0.21754	4.36701	199.9	7.92	18.2064	129.17	750.674	0.172072
08240210a	P05-01-z1A1	0.01832	3.05677	117	3.58	0.28316	7.56463	253.2	16.96	2.88509	12.4714	163.799	0.0761384
13240210a	P05-01-z1C1	0.01897	2.42488	121.1	2.9	0.17141	4.74885	160.6	7.06	7.28841	16.1079	471.18	0.0341862
19240210a	P05-01-z1C2	0.02116	2.36295	135	3.2	0.16048	4.83549	151.1	6.8	7.09236	22.1037	426.113	0.0518728
20240210a	P05-01-z1C3	0.01968	2.43902	125.7	3.02	0.1696	4.90566	159.1	7.22	6.35031	17.3456	395.645	0.0438413
30240210a	P05-01-z2B2	0.0195	2.46154	124.5	3.08	0.16209	5.63884	152.5	8	8.00318	14.3299	512.74	0.0279477
34240210a	P05-01-z3B	0.01912	2.51046	122.1	3.02	0.18192	5.39798	169.7	8.44	9.3838	20.8757	598.158	0.0349
37240210a	P05-01-z4A1	0.01923	2.4961	122.8	3.06	0.18069	5.63396	168.7	8.76	5.5425	15.9244	348.744	0.0456621
38240210a	P05-01-z4A2	0.01925	2.49351	122.9	3.02	0.16876	5.49893	158.3	8.06	5.93589	13.1406	376.836	0.034871
41240210a	P05-01-z5A1	0.02205	2.35828	140.6	3.26	0.17078	4.50872	160.1	6.68	7.29187	14.6374	417.769	0.035037
40240210a	P05-01-z5A2	0.01983	2.62229	126.6	3.24	0.21633	5.95387	198.8	10.76	4.59213	16.4996	270.906	0.0609053
44240210a	P05-01-z5A4	0.02021	2.57298	129	3.28	0.27408	5.42177	246	11.84	4.36748	10.7206	236.706	0.0452909
07240210b	P05-01-z5A5	0.01964	2.03666	125.4	2.5	0.17875	3.82657	167	5.88	6.71881	15.4829	419.834	0.0368786
08240210b	P05-01-z5B1	0.02087	2.01246	133.2	2.6	0.17055	3.4594	159.9	5.12	9.98322	23.5719	600.499	0.0392539
09240210b	P05-01-z5B2	0.02	2.1	127.7	2.66	0.18209	4.50327	169.9	7.04	7.53183	12.4984	467.052	0.0267603
10240210b	P05-01-z5B3	0.01927	2.07577	123	2.48	0.16621	4.05511	156.1	5.88	8.7125	9.11605	570.044	0.0159918
11240210b	P05-01-z5B4	0.019	2	121.3	2.42	0.13615	4.05435	129.6	4.94	7.53789	19.9316	508.063	0.0392306
13240210b	P05-01-z5D1	0.02005	2.19451	109.7	2.24	0.17065	5.32083	179.8	6.48	6.54056	19.957	402.791	0.0495469
19240210b	P05-01-z5E1	0.01901	2.20936	121.4	2.7	0.14937	5.87802	141.4	7.76	5.8045	11.217	389.11	0.0288273
22240210b	P05-01-z5E3	0.0201	2.08955	128.3	2.66	0.192	4.39583	178.3	7.18	7.43123	22.9778	448.276	0.051258
29240210b	P05-01-Z6D	0.01942	2.05973	124	2.58	0.14012	4.71025	133.2	5.88	8.59442	26.2653	567.672	0.0462684
31240210b	P05-01-z7B1	0.01899	2.10637	121.2	2.58	0.14059	5.10705	133.6	6.4	8.30926	24.7425	550.654	0.0449329
34240210b	P05-01-z7A1	0.0199	2.01005	127	2.58	0.1509	4.22797	142.7	5.62	9.52325	21.7526	607.599	0.035801
37240210b	P05-01-z7A2	0.01877	2.23761	119.9	2.66	0.23192	5.10521	211.8	9.76	4.60108	16.4805	274.227	0.0600978
42240210b	P05-01-z7E	0.0213	2.15962	135.9	2.84	0.21251	4.4892	195.7	8	6.76614	18.2506	381.916	0.047787
43240210b	P05-01-z8B	0.01841	2.0641	117.6	2.44	0.13347	4.72016	127.2	5.66	7.74594	21.7454	538.46	0.0403845

## Sheet: P04-44 + P05-02 zr
			Isotopic ratios		Ages (Ma)		Isotopic ratios		Ages (Ma)		Content
	Analysis	sample	206Pb/238U	2s %	206Pb/238U	2s	207Pb/235U	2s %	207Pb/235U	2s	Pb ppm	Th ppm	U ppm	Th/U
P04-44	De14b28	P04-44-01P c	0.02296	2.00348	146.3	2.88	0.1561	2.47277	147.3	3.4	3.6261	0.377181	213.53	0.00176641
	De13b44	P04-44-01P r	0.02236	1.87835	142.5	3	0.151	2.09272	142.8	2.8	9.90323	0.41718	570.524	0.000731223
	De14b29	P04-44-02P c	0.02175	2.02299	138.7	2.72	0.14803	2.40492	140.2	3.14	3.88484	0.623972	223.757	0.00278862
	De13b45	P04-44-02P r	0.0212	2.16981	135.2	3	0.14293	2.40677	135.6	3.06	23.399	5.11083	1409.8	0.00362523
	De14b30	P04-44-03P c	0.0219	2.37443	139.6	3.24	0.14591	4.75636	138.3	6.16	3.06476	0.499315	181.621	0.00274922
	De13b46	P04-44-03P r	0.02064	1.93798	131.7	3	0.14321	2.89086	135.9	3.68	2.3652	0.100183	141.924	0.000705891
	De13c06	P04-44-04P r	0.02287	1.92392	145.8	3	0.15429	2.38512	145.7	3.24	3.87723	0.00398345	220.627	1.80552e-05
	De14b39	P04-44-07P c	0.0214	2.05607	136.5	2.76	0.14318	2.43051	135.9	3.1	6.46432	0.276263	384.375	0.000718733
	De14b40	P04-44-08P c	0.0215	2.04651	137.1	2.82	0.14564	3.74897	138.1	4.84	3.09081	0.345529	182.772	0.00189049
	De13c10	P04-44-08P r	0.02239	2.59044	142.7	4	0.14987	7.56656	141.8	10.02	1.47836	0	77.7508	0
	De13c11	P04-44-09P r	0.02192	2.18978	139.8	2.98	0.15032	3.63225	142.2	4.82	7.75651	3.07023	435.955	0.00704254
	De14b42	P04-44-10aP c	0.0214	2.24299	136.5	3.08	0.1491	4.05097	141.1	5.34	3.78405	1.99916	221.49	0.00902598
	De13c12	P04-44-10P r	0.02279	1.93067	145.2	2.8	0.15418	1.98469	145.6	2.7	17.9038	0.665349	1008.97	0.000659432
	De14c05	P04-44-11P c	0.02221	1.89104	141.6	2.66	0.15012	2.07834	142	2.74	11.0948	1.70141	643.789	0.00264281
	De13c13	P04-44-11P r	0.02294	1.91805	146.2	2.82	0.15583	2.02785	147	2.78	13.4867	0.450246	756.799	0.000594935
	De13c14	P04-44-12P r	0.0237	1.94093	151	2.92	0.16075	2.06532	151.4	2.9	10.272	0.0908509	552.457	0.000164449
	De14c07	P04-44-13aP c	0.02084	2.11132	133	2.74	0.14172	3.4293	134.6	4.32	2.37119	0.574691	147.278	0.00390208
	De14c08	P04-44-14P c	0.02196	2.09472	140.1	2.86	0.1479	3.09669	140.1	4.06	3.35507	0.103228	197.643	0.000522294
	De14c09	P04-44-15P c	0.02181	2.01742	139.1	2.84	0.14731	2.91901	139.5	3.8	4.32682	0.262828	255.55	0.00102848
	Ap13c26	P04-44-04P c	0.04688	3.37031	295.3	10	0.33307	3.93311	291.9	9.98	3.73791	0.362402	222.889	0.00162593
	Ap13c27	P04-44-04P r	0.02252	3.64121	143.5	5	0.15743	7.58432	148.5	10.48	23.9168	1.10376	1372.93	0.000803942
	Ap13c24	P04-44-10P c	0.04374	3.5208	276	10	0.31585	5.80655	278.7	14.14	17.5516	2.29933	1035.4	0.00222072
	Ap13c25	P04-44-13P c	0.04803	3.24797	302.4	10	0.35114	4.74455	305.6	12.52	5.08209	3.06635	264.204	0.011606
	20050210b	P04-44-01 c	0.04146	2.07429	261.9	5.34	0.29481	2.82216	262.3	6.52	40.2651	710.947	1079.3	0.658708
	21050210b	P04-44-01 r	0.02615	2.44742	166.4	4.06	0.18432	6.00043	171.8	9.5	1.9814	0.178389	95.6854	0.00186433
	23050210b	P04-44-02 c	0.04132	2.12972	261	5	0.29889	3.15166	265.5	7.38	24.679	242.005	679.067	0.356379
	22050210b	P04-44-02 r	0.01825	2.19178	116.6	3	0.12364	4.28664	118.4	4.78	5.15647	0.488137	367.387	0.00132867
	08050210c	P04-44-03 c	0.04514	2.12672	284.6	6	0.32068	2.41986	282.4	5.96	52.2653	336.981	1413.07	0.238475
	07050210c	P04-44-03 r	0.02136	2.24719	136.2	3	0.1435	3.84669	136.2	4.9	4.72407	2.24701	287.3	0.00782114
	09050210c	P04-44-04 r	0.02203	2.72356	140.5	3.72	0.15644	6.80133	147.6	9.34	2.1418	2.11451	123.05	0.0171842
	10050210c	P04-44-05 c	0.02401	2.24906	152.9	3.38	0.16336	3.89324	153.6	5.54	3.16338	0.263021	169.504	0.00155171
	11050210c	P04-44-05 r	0.02176	2.11397	138.8	2.9	0.14793	2.52822	140.1	3.3	15.0464	2.65242	907.265	0.00292353
	14050210c	P04-44-06 c	0.03578	2.12409	226.6	3.06	0.25396	2.60671	229.8	5.36	28.6671	381.929	942.251	0.405337
	13050210c	P04-44-06 r	0.02222	2.16022	141.7	4.72	0.14586	3.31825	138.2	4.3	3.85424	0.243231	226.007	0.00107621
	17050210c	P04-44-08 r	0.02299	2.17486	146.5	3.1	0.15352	2.9703	145	4.02	7.8059	0.675864	444.637	0.00152004
	20050210c	P04-44-09 c	0.04091	2.10218	258.5	5.3	0.28917	2.39997	257.9	5.46	76.4928	636.228	2273.99	0.279784
	22050210c	P04-44-11 c	0.03716	2.09903	235.2	3.16	0.26155	2.63047	235.9	5.54	65.6477	189.646	2271.24	0.0834989
	21050210c	P04-44-11 r	0.01987	2.51636	126.8	4.86	0.13727	5.9882	130.6	7.34	2.9353	0.192388	172.062	0.00111814
	24050210c	P04-44-12 c	0.04177	2.10678	263.8	3	0.30389	2.81681	269.4	6.66	27.2954	185.572	801.722	0.231466
	23050210c	P04-44-12 r	0.02156	2.22635	137.5	5.46	0.14939	3.62809	141.4	4.78	5.53887	0.410786	333.966	0.00123002
	27050210c	P04-44-13 r	0.0245	2.85714	156	4.42	0.16913	8.14758	158.7	11.96	2.9991	2.96881	153.269	0.0193699
P05-2	28050210c	P05-2A-01 r	0.02331	2.145	148.5	3.16	0.15611	3.22849	147.3	4.44	9.60997	2.31279	537.839	0.00430015
	29050210c	P05-2A-02 c	0.03734	2.08891	236.3	4.88	0.26126	2.75588	235.7	5.8	18.8632	433.442	544.224	0.79644
	30050210c	P05-2A-02 r	0.02216	2.07581	141.3	2.96	0.15137	2.95964	143.1	3.94	8.66752	1.90654	508.598	0.00374863
	31050210c	P05-2A-03 c	0.03399	2.11827	215.5	4.46	0.23863	2.80769	217.3	5.5	11.4967	237.436	380.753	0.623596
	32050210c	P05-2A-03 r	0.02201	2.08996	140.3	2.94	0.14601	3.05459	138.4	3.96	7.5966	1.27329	451.3	0.00282139
	33050210c	P05-2A-05 r	0.02286	2.18723	145.7	3.1	0.15652	3.34781	147.7	4.6	4.48388	0.428205	254.27	0.00168406
	Ap13c28	P05-2A-06P c	0.03236	2.84302	205.3	6	0.22841	3.80018	208.9	7.18	17.997	55.3329	613.985	0.090121
	Ap13c29	P05-2A-06P r	0.02218	3.33634	141.4	5	0.14725	5.5416	139.5	7.22	8.82175	0.330036	505.634	0.000652718
	Ap13c32	P05-2A-11P c	0.03616	2.88	229	6	0.25699	3	232.2	6.28	23.3452	87.9877	702.578	0.125235
	37050210c	P05-2A-11 c	0.02175	2.2069	138.7	2.98	0.14942	3.5872	141.4	4.74	5.01506	0.727655	296.183	0.00245677
	38050210c	P05-2A-15 r	0.01865	2.25201	119.1	2.68	0.12535	4.41963	119.9	5	4.88238	1.26407	340.523	0.00371212
		c : core
		r : rim

## Sheet: P04-44 Rt
	Isotopic ratios		Ages (Ma)		Isotopic ratios		Ages (Ma)		Content
Analysis	206Pb/238U	2s %	206Pb/238U	2s	207Pb/235U	2s %	207Pb/235U	2s	Pb ppm	Th ppm	U ppm
06160512a	0.0063	4.7619	40.5	1.9	0.04023	19.2891	40	7.58	0.507465	0	81.8185
07160512a	0.00639	5.00782	41.1	2.04	0.04318	18.7124	42.9	7.86	0.430716	0	71.5904
08160512a	0.00632	5.06329	40.6	2.1	0.0477	17.2327	47.3	7.98	0.480338	0	81.1691
06210512b	0.00638	4.07524	41	1.68	0.04568	12.5219	45.4	5.56	0.558723	0	92.9243
07210512b	0.00652	3.68098	41.9	1.5	0.04917	9.43665	48.7	4.5	0.636731	0	99.447
09210512b	0.00645	4.34109	41.5	1.76	0.06569	10.7779	64.6	6.76	0.65446	0	96.8759
24210512b	0.00599	4.34057	38.5	1.7	0.07623	10.547	74.6	7.58	0.570147	0	90.7311
Discordant data
05160512a	0.00604	4.63576	38.8	1.82	0.05623	14.5474	55.5	7.86	0.521359	0	84.5129
09160512a	0.00627	4.46571	40.3	1.8	0.08648	10.2914	84.2	8.32	0.659228	0	103.626
11160512a	0.00746	7.5067	47.9	3.58	0.12542	17.1743	120	19.44	0.781751	0	92.2737
12160512a	0.0066	4.24242	42.4	1.86	0.15436	7.9036	145.8	10.72	0.958211	0	111.167
16160512a	0.0073	6.30137	46.9	2.96	0.09803	15.6075	95	14.14	0.596634	0	74.0702
18160512a	0.00635	4.72441	40.8	1.88	0.06389	13.3667	62.9	8.14	0.721155	0.00326299	108.987
20160512a	0.00675	4.14815	43.3	1.78	0.0894	9.61969	86.9	8.02	0.742923	0	104.294
21160512a	0.00905	4.86188	58.1	2.8	0.28455	7.75962	254.3	17.46	0.64273	0.0090016	48.5132
22160512a	0.00782	7.67263	50.2	3.8	0.24772	12.6675	224.7	25.54	0.693849	0.0022504	60.7817
25160512a	0.00795	8.80503	51	4.52	0.38519	12.046	330.8	34	0.887418	0	61.659
26160512a	0.00678	7.07965	43.6	3.14	0.17815	13.2697	166.5	20.38	0.452569	0.0782014	47.5024
27160512a	0.00677	6.79468	43.5	2.9	0.10895	15.5117	105	15.48	0.595701	0.0005626	73.8851
28160512a	0.00712	6.17978	45.7	2.86	0.09181	15.6628	89.2	13.38	0.636596	0.0005626	83.3576
29160512a	0.00682	4.10557	43.8	1.8	0.14673	7.57855	139	9.84	0.981667	0.00178413	115.626
30160512a	0.00827	4.83676	53.1	2.58	0.17265	9.86968	161.7	14.76	0.766582	0.0107048	71.5476
32160512a	0.00601	6.98835	38.6	2.7	0.13456	14.0606	128.2	16.94	0.579073	0.507882	74.6991
36160512a	0.00653	7.65697	41.9	3.18	0.10443	17.9067	100.9	17.2	0.732114	0.0112995	94.9594
37160512a	0.0187	4.17112	119.4	4.9	1.46126	4.50433	914.5	27.16	5.4417	0.0271613	113.518
05210512b	0.00632	3.16456	40.6	1.3	0.04207	7.98669	41.8	3.28	0.704608	0	121.411
08210512b	0.00623	4.49438	40.1	1.78	0.04817	13.5354	47.8	6.32	0.530356	0.0117151	89.0509
10210512b	0.00588	4.42177	37.8	1.64	0.10205	8.8584	98.7	8.32	0.768263	0.000423662	112.975
11210512b	0.00791	4.04551	50.8	2.04	0.30541	5.54664	270.6	13.18	1.53508	0.00466028	115.817
12210512b	0.00702	4.2735	45.1	1.92	0.19957	6.83469	184.8	11.54	1.16302	0.00508394	117.396
16210512b	0.00618	4.20712	39.7	1.64	0.068	10.1471	66.8	6.56	0.655681	0.0665149	99.0445
17210512b	0.01206	3.81426	77.3	2.88	0.74266	4.30345	564	18.62	2.77783	0.000423662	104.048
18210512b	0.0068	4.70588	43.7	2	0.06458	12.7284	63.5	7.84	0.677907	0	98.6484
19210512b	0.0072	4.16667	46.3	1.88	0.21586	6.32818	198.5	11.4	0.904038	0.0118625	84.9045
20210512b	0.00732	4.91803	47	2.24	0.23628	7.41493	215.4	14.38	1.05135	0.492588	95.7347
21210512b	0.0071	3.94366	45.6	1.82	0.13578	7.48269	129.3	9.08	0.815607	0	96.1224
22210512b	0.00651	3.99386	41.8	1.62	0.13077	6.95878	124.8	8.18	0.743184	0.0194909	97.3505
23210512b	0.00612	3.92157	39.3	1.52	0.04286	11.7126	42.6	4.9	0.535637	0	93.6358
