# Supplementary material
Source: Oxford University Press journal article supplement (doi:10.1051/bsgf_2017195)
Supplement: bsgf_2017_188_6_170006-1-olm.zip [file bsgf_2017_188_6_170006-1-olm.zip › bsgf170006-1-olm/GAUTIER-Supplement6.xls]

## Sheet: Feuil1
Sample P03-9 : Zr-in-rutile thermometry for small rutile grains associated with the ~36 Ma-old monazite overgrowths in the matrix
n°	1		2		3		4		5		6		7		8		9
Zr (2σ) ppm	206.09	(51)	240.64	(63)	205.45	(55)	247.45	(68)	220.55	(62)	256.61	(74)	221.5	(65)	215.19	(65)	272.68	(84)	Weighted mean temperature
T (2σ) °C	Watson et al. (2006)
	612.86	(56)	624.837	(62)	612.623	(59)	627.028	(65)	618.061	(63)	629.898	(69)	618.392	(66)	616.167	(66)	634.735	(76)	621 ± 21 ºC
T (2σ) °C	Ferry and Watson (2007)
	614.201	(56)	626.054	(67)	613.967	(59)	628.221	(72)	619.348	(66)	631.061	(77)	619.677	(69)	617.474	(69)	635.845	(87)	621 ± 23 ºC
(2σ error)
