# Supplementary material
Source: Oxford University Press journal article supplement (doi:10.1051/bsgf_2017195)

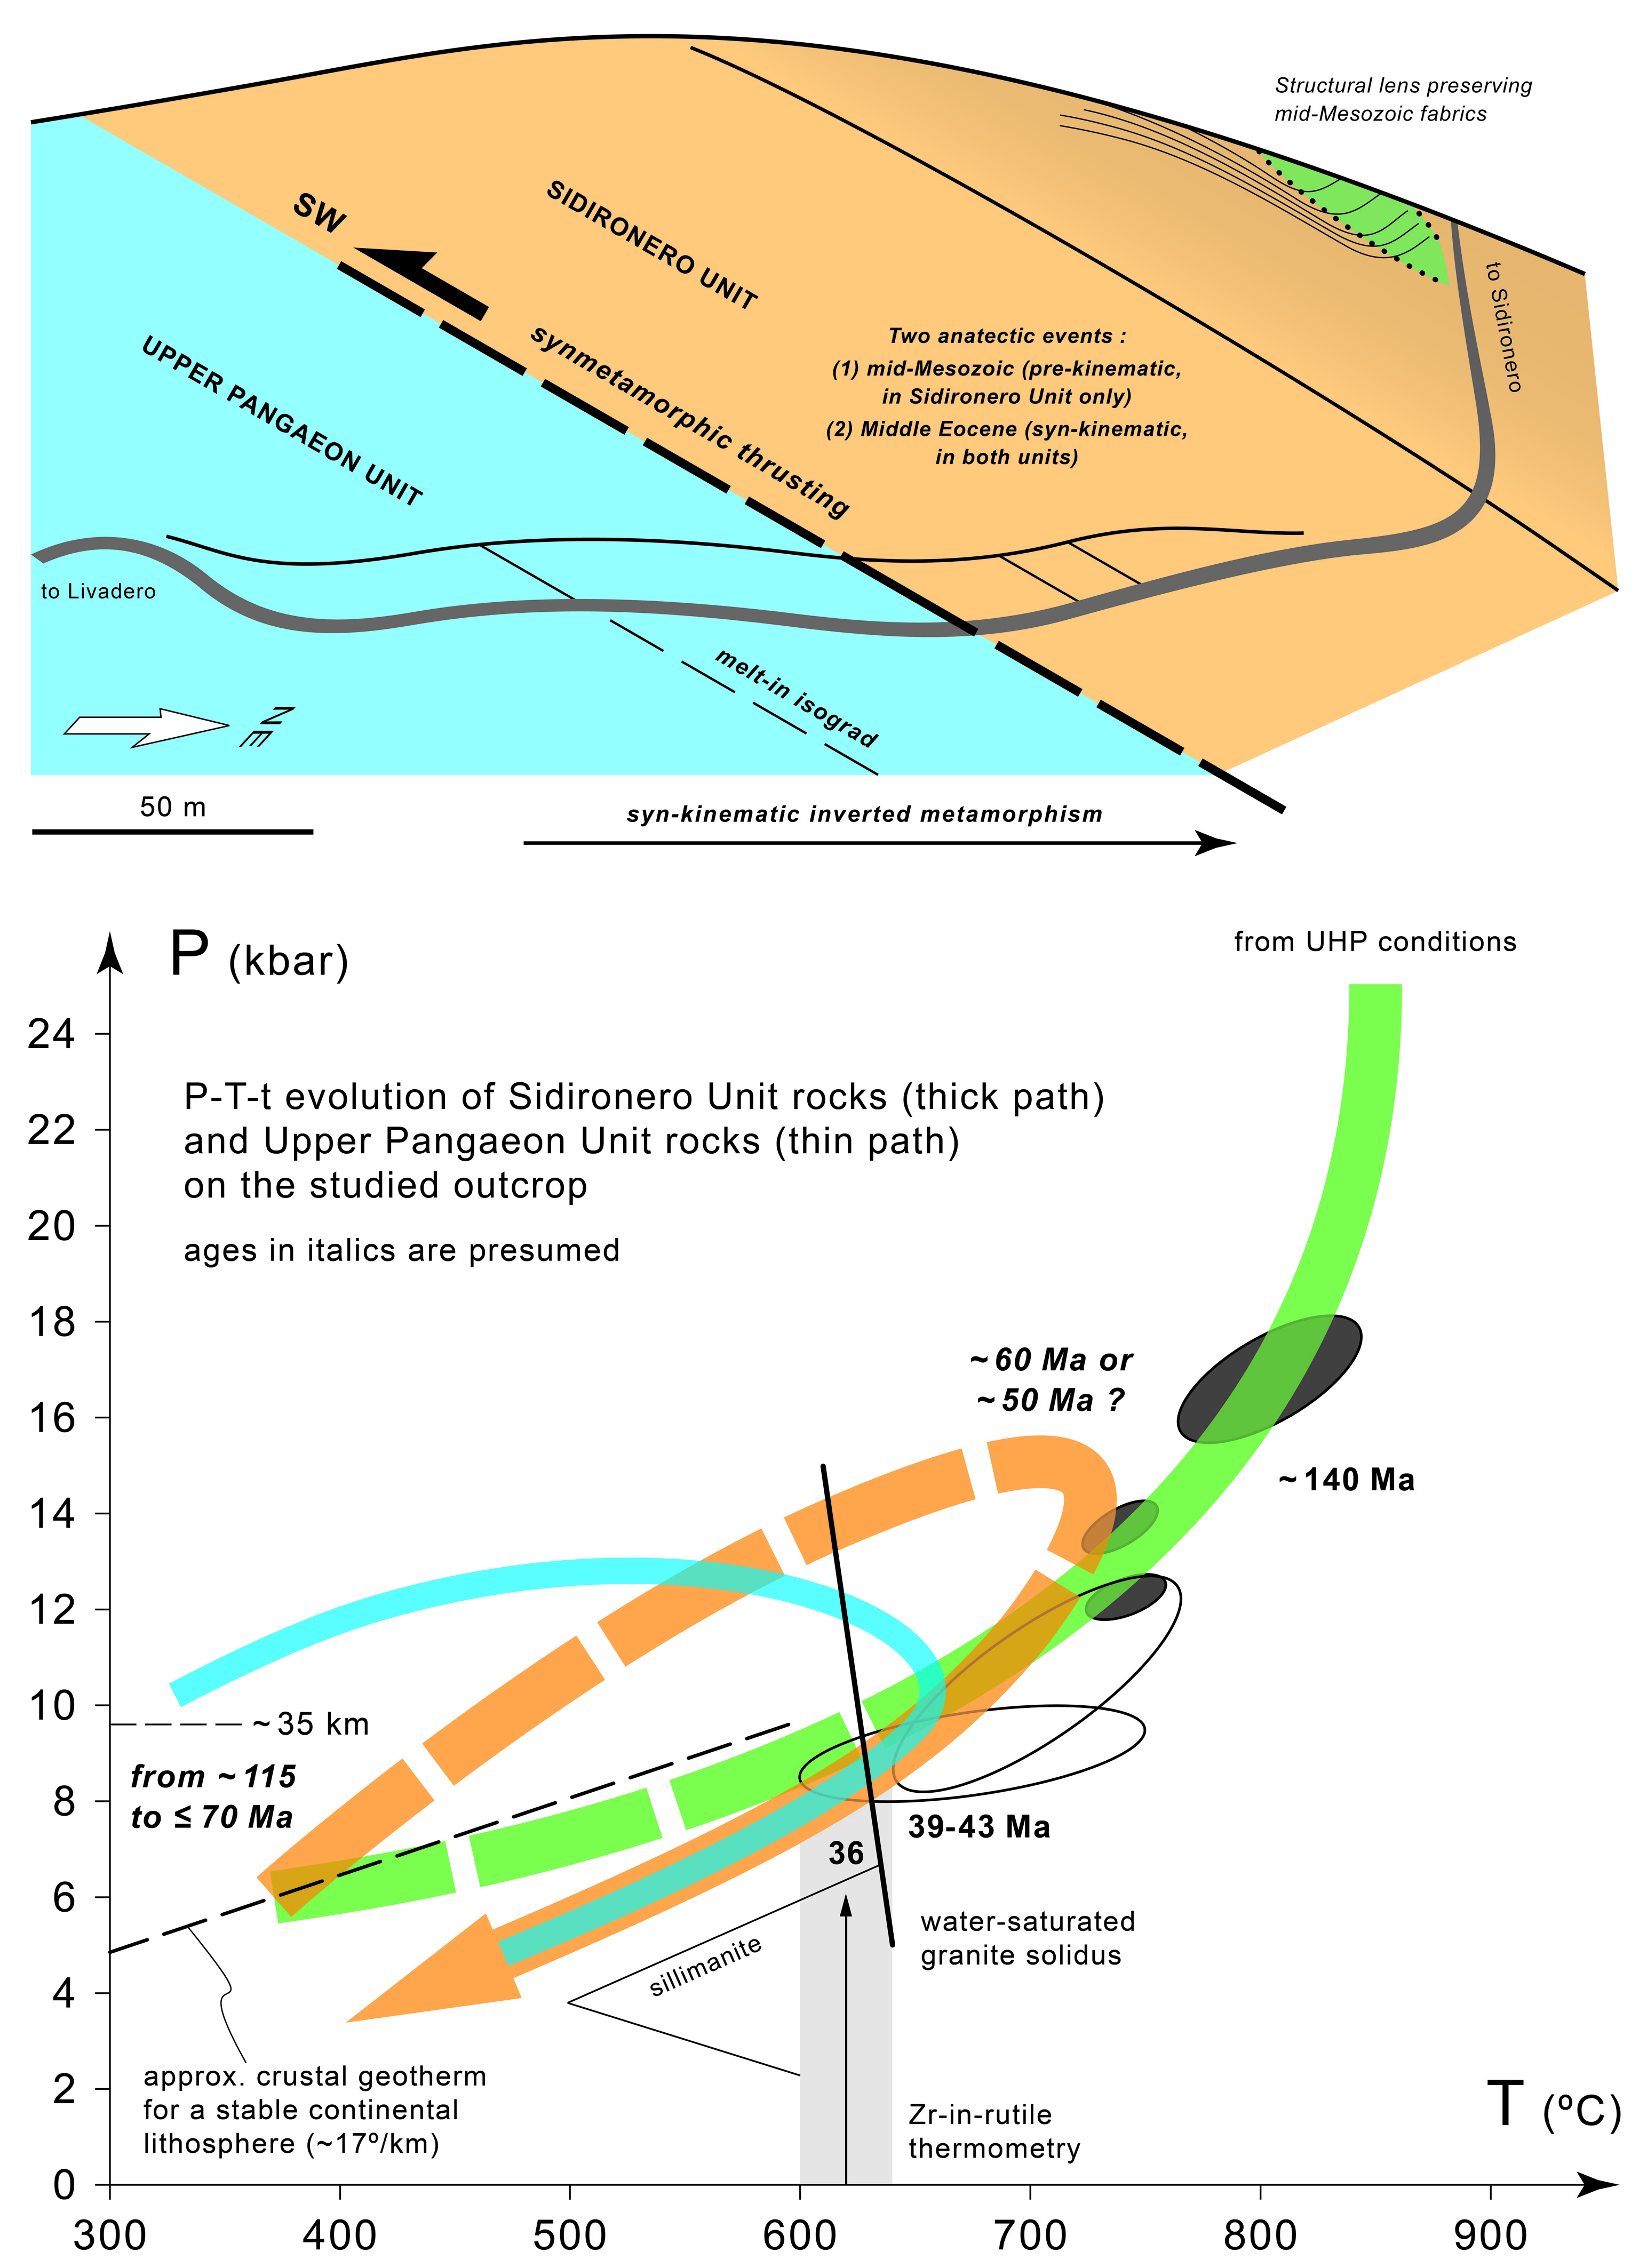

Supplement: bsgf_2017_188_6_170006-1-olm.zip [file bsgf_2017_188_6_170006-1-olm.zip › bsgf170006-1-olm/GAUTIER-graphic_abstract.jpg]
